# Supplementary material for: Preparation of Modified Chitosan Microsphere-Supported Copper Catalysts for the Borylation of α,β-Unsaturated Compounds
Source: PubMed Central journal article supplement (PMC6788198; doi:10.3390/polym11091417), 2019-08-28

# Supplementary information for

## Preparation of Modified Chitosan Microspheres Supported Copper Catalysts for The Borylation of $\alpha,\beta$ -Unsaturated Compounds

Wei Wang<sup>1</sup>, Zufeng Xiao<sup>1</sup>, Chaofan Huang<sup>1</sup>, Kewang Zheng<sup>1</sup>, Yin Luo<sup>1</sup>, Yumin Dong<sup>1</sup>, Zitong Shen<sup>1</sup>, Wei Li<sup>1,\*</sup>, Caiqin Qin<sup>1,2,\*\*</sup>

<sup>1</sup> School of Chemistry and Materials Science, Hubei Engineering University, Xiaogan 432000, China

<sup>2</sup> Key Laboratory of Biological Resources and Environmental Biotechnology, Hubei Province

Wei Wang<sup>1</sup> and Zufeng Xiao<sup>1</sup> are contributed equally.

\*Correspondence to: Wei Li (E-mail: [weili@hbeu.edu.cn](mailto:weili@hbeu.edu.cn))

\*\* Correspondence to: Caiqin Qin (E-mail: [qincq@hbeu.edu.cn](mailto:qincq@hbeu.edu.cn))

General Procedure for CSM@Cu<sup>0</sup>Catalyzed Borylation of  $\alpha,\beta$ -Unsaturated Acceptors in Aqueous Media

In a sample vial, acetone (0.5 mL) and H<sub>2</sub>O (0.5 mL) were successively added to a mixture of CSM@Cu<sup>0</sup> (3.8 mg, 1 mol %) and B<sub>2</sub>(pin)<sub>2</sub> (60.9 mg, 0.24 mmol) under air. The reaction mixture was stirred for 0.5 h at room temperature, followed by successive addition of substrate (**4**) (0.2 mmol). After stirring for 8 h at room temperature, the reaction mixture was filtered and the filtrate was extracted with EtOAc (20 mL) three times. The combined organic phase was concentrated under reduced pressure and the residue was dissolved in THF (1 mL) and H<sub>2</sub>O (0.5 mL). Excess amount of NaBO<sub>3</sub>•4H<sub>2</sub>O (244 mg) was then added and the mixture was stirred at room temperature for 4 h. The aqueous layer was extracted with EtOAc (20 mL) three times, and the combined organic layers were dried over anhydrous Na<sub>2</sub>SO<sub>4</sub>. After concentrated under reduced pressure, the crude mixture was purified by preparative TLC to afford the desired product **6**.

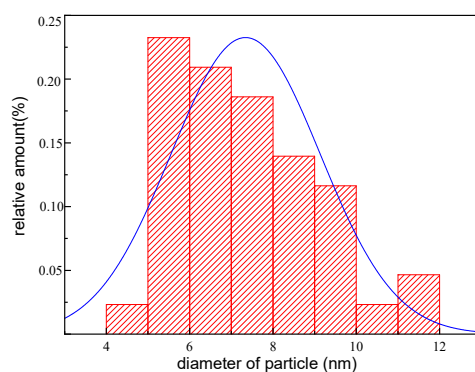

Figure S1. Diameter distribution of copper nanoparticles (CSM@Cu<sup>0</sup>)

Table 1S. The content of N, C, H, O of chitosan microspheres (CS) and of modified chitosan microspheres (CSM)

| Compound | H(w%) | C(w%) | N(w%) | O(w%) | C:N:O(Atomic%:Atomic%:Atomic%) |
|----------|-------|-------|-------|-------|--------------------------------|
| CS       | 6.81  | 44.91 | 8.63  | 39.65 | 6.04:0.994:4                   |
| CSM      | 5.93  | 54.23 | 9.72  | 30.12 | 9.6: 1.473:4                   |

Table 2S. The adsorption of the CS and CSM

| Entry          | Conc. before adsorption ( $C_0$ , mg/L) | Adsorption Time (min) | Conc. after adsorption ( $C_i$ , mg/L) | Adsorption conc. (mg/L) | Adsorption (%) | Absorption capacity ( $q_i$ , mg/g) |
|----------------|-----------------------------------------|-----------------------|----------------------------------------|-------------------------|----------------|-------------------------------------|
| 1 <sup>a</sup> | 100.63                                  | 180                   | 2.62                                   | 98.01                   | 97.40          | 98.01                               |
| 2 <sup>b</sup> | 100.32                                  | 180                   | 42.71                                  | 57.61                   | 57.43          | 57.43                               |

a. CSM, pH =5; b. CS, pH =5

Table. 3S Swelling capability of CSM at different pH value

| Entry | pH | Initial quality ( $m_0$ , g) | Quality after swelling for 3h ( $m_i$ , g) | Quality after drying ( $m_f$ , g) | Swelling capability (SC = $\frac{m_i - m_f}{m_f} \times 100\%$ ) |
|-------|----|------------------------------|--------------------------------------------|-----------------------------------|------------------------------------------------------------------|
| 1     | 2  | 0.1036                       | 0.2766                                     | 0.0812                            | 240.6                                                            |
| 2     | 3  | 0.1070                       | 0.2480                                     | 0.0939                            | 164.1                                                            |
| 3     | 4  | 0.1047                       | 0.1528                                     | 0.0965                            | 58.3                                                             |
| 4     | 5  | 0.0999                       | 0.1465                                     | 0.0977                            | 49.9                                                             |

All products are literature-known; obtained analytical data is in full agreement with reported data.

### 6a. 3-Hydroxy-1,3-diphenylpropan-1-one

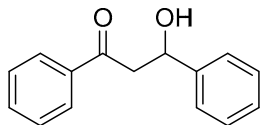

Colorless oil

<sup>1</sup>H NMR (400 MHz, Chloroform-d)  $\delta$  7.96 (d,  $J$  = 8.0 Hz, 2H), 7.62 – 7.55 (m, 1H), 7.46 (dd,  $J$  = 11.1, 7.6 Hz, 4H), 7.39 (t,  $J$  = 7.5 Hz, 2H), 7.34 – 7.28 (m, 1H), 5.36 (t,  $J$  = 6.2 Hz, 1H), 3.61 (br, 1H), 3.41 – 3.33 (m, 2H).

<sup>13</sup>C NMR (100 MHz, Chloroform-d)  $\delta$  = 199.9, 143.0, 136.5, 133.4, 128.5, 128.4, 128.0, 127.5, 125.6, 69.9, 47.3.

### 6b. 3-Hydroxy-3-phenyl-1-(*p*-tolyl)propan-1-one

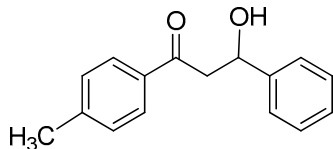

White solid

<sup>1</sup>H NMR (400 MHz, Chloroform-d)  $\delta$  7.86 (d,  $J$  = 8.3 Hz, 2H), 7.46 – 7.42 (m, 2H), 7.41 – 7.36 (m, 2H), 7.31 (d,  $J$  = 7.3 Hz, 1H), 7.29 – 7.24 (m, 4H), 5.34 (t,  $J$  = 7.5 Hz, 1H), 3.66 (br, 1H), 3.38 – 3.31 (m, 2H), 2.42 (s, 3H).

<sup>13</sup>C NMR (101 MHz, Chloroform-d)  $\delta$  199.8, 144.6, 143.0, 134.1, 129.3, 128.5, 128.2, 127.6, 125.72, 70.1, 47.2, 21.7.

### 6c. 3-Hydroxy-3-phenyl-1-(*m*-tolyl)propan-1-one

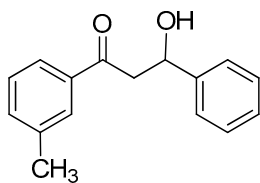

White solid

$^1\text{H}$  NMR (400 MHz, Chloroform- $d$ )  $\delta$  7.78 – 7.73 (m, 2H), 7.47 – 7.43 (m, 2H), 7.42 – 7.28 (m, 5H), 5.34 (td,  $J$  = 6.1, 2.0 Hz, 1H), 3.70 (s, 1H), 3.37 (d,  $J$  = 6.0 Hz, 2H), 2.41 (s, 3H).

$^{13}\text{C}$  NMR (101 MHz, Chloroform- $d$ )  $\delta$  200.3, 142.9, 138.4, 136.5, 134.3, 128.6, 128.5, 128.5, 127.6, 125.7, 125.3, 69.9, 47.3, 21.3.

4. 3-Hydroxy-1-(4-methoxyphenyl)-3-phenylpropan-1-one

**6d** 3-hydroxy-1-(4-methoxyphenyl)-3-phenylpropan-1-one

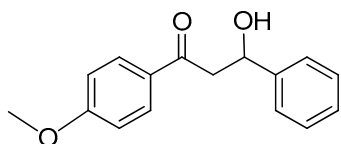

White solid

$^1\text{H}$  NMR (400 MHz, Chloroform- $d$ )  $\delta$  7.96 – 7.90 (m, 2H), 7.47 – 7.42 (m, 2H), 7.41 – 7.34 (m, 2H), 7.31 (d,  $J$  = 7.2 Hz, 1H), 6.93 (d,  $J$  = 8.9 Hz, 2H), 5.37 – 5.29 (m, 1H), 3.87 (s, 3H), 3.78 – 3.73 (br, 1H), 3.37 – 3.24 (m, 2H).

$^{13}\text{C}$  NMR (101 MHz, Chloroform- $d$ )  $\delta$  199.8, 164.0, 144.6, 143.0, 134.1, 129.3, 128.50, 128.24, 127.6, 125.7, 70.1, 47.2.

**6e** 1-(4-fluorophenyl)-3-hydroxy-3-phenylpropan-1-one

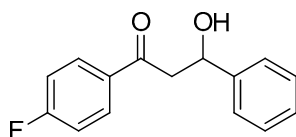

Colorless oil

$^1\text{H}$  NMR (400 MHz, Chloroform- $d$ )  $\delta$  8.02 – 7.93 (m, 2H), 7.47 – 7.41 (m, 2H), 7.41 – 7.35 (m, 2H), 7.34 – 7.27 (m, 1H), 7.18 – 7.08 (m, 2H), 5.40 – 5.25 (m, 1H), 3.48 (d,  $J$  = 2.9 Hz, 1H), 3.42 – 3.26 (m, 2H).

$^{13}\text{C}$  NMR (101 MHz, Chloroform- $d$ )  $\delta$  198.4, 167.2, 164.7, 142.8, 133.0, 133.0, 130.8, 130.8, 128.5, 127.7, 125.7, 115.9, 115.7, 70.0, 47.3.

**6f** 3-Hydroxy-1-phenyl-3-(*p*-tolyl)propan-1-one

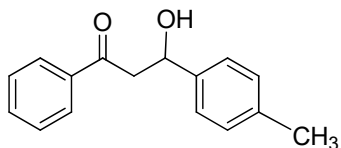

Colorless oil

$^1\text{H}$  NMR (400 MHz, Chloroform- $d$ )  $\delta$  7.99 – 7.92 (m, 2H), 7.61 – 7.55 (m, 1H), 7.51 – 7.42 (m, 2H), 7.36 – 7.30 (m, 2H), 7.19 (d,  $J$  = 7.8 Hz, 2H), 5.32 (s, 1H), 3.54 (d,  $J$  = 2.7 Hz, 1H), 3.45 – 3.30 (m, 2H), 2.36 (s, 3H).

$^{13}\text{C}$  NMR (101 MHz, Chloroform- $d$ )  $\delta$  200.0, 140.0, 137.2, 136.5, 133.5, 129.1, 128.6, 128.0, 125.6, 69.8, 47.34, 21.06.

**6g.** 3-Hydroxy-3-(4-methoxyphenyl)-1-phenylpropan-1-one

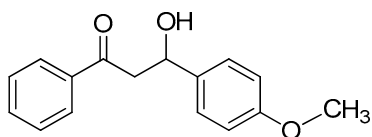

White solid

$^1\text{H}$  NMR (400 MHz, Chloroform- $d$ )  $\delta$  7.99 – 7.93 (m, 2H), 7.61 – 7.55 (m, 1H), 7.47 (dd,  $J$  = 8.4, 7.0 Hz, 2H), 7.41 – 7.34 (m, 2H), 6.95 – 6.88 (m, 2H), 5.30 (s, 1H), 3.81 (s, 3H), 3.52 (d,  $J$  = 2.8 Hz, 1H), 3.43 – 3.29 (m, 2H).

$^{13}\text{C}$  NMR (101 MHz, Chloroform- $d$ )  $\delta$  200.0, 158.9, 136.5, 135.1, 133.4, 128.5, 128.0, 126.9, 113.8, 69.6, 55.1, 47.2.

**6h.** 3-(4-fluorophenyl)-3-hydroxy-1-phenylpropan-1-one

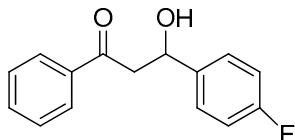

Colorless oil

$^1\text{H}$  NMR (400 MHz, Chloroform- $d$ )  $\delta$  8.00 – 7.92 (m, 2H), 7.64 – 7.56 (m, 1H), 7.47 (t,  $J$  = 7.7 Hz, 2H), 7.44 – 7.38 (m, 2H), 7.12 – 7.01 (m, 2H), 5.52 – 5.08 (m, 1H), 3.62 (d,  $J$  = 2.9 Hz, 1H), 3.49 – 3.07 (m, 2H).

$^{13}\text{C}$  NMR (101 MHz, Chloroform- $d$ )  $\delta$  200.00, 163.4, 160.9, 138.7, 138.7, 136.5, 133.7, 128.7, 128.1, 127.4, 127.3, 115.4, 115.2, 69.4, 47.3.

**6i.** 3-(4-chlorophenyl)-3-hydroxy-1-phenylpropan-1-one

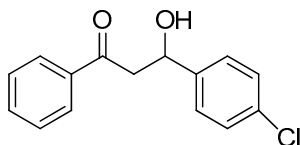

Colorless oil

$^1\text{H}$  NMR (400 MHz, Chloroform-d)  $\delta$  7.98 – 7.91 (m, 2H), 7.64 – 7.56 (m, 1H), 7.50 – 7.43 (m, 2H), 7.40 – 7.31 (m, 4H), 5.33 (dt,  $J$  = 7.6, 3.7 Hz, 1H), 3.64 (q,  $J$  = 3.0 Hz, 1H), 3.40 – 3.25 (m, 2H).  
 $^{13}\text{C}$  NMR (101 MHz, Chloroform-d)  $\delta$  199.8, 141.4, 136.3, 133.7, 133.2, 128.6, 128.6, 128.0, 127.1, 127.1, 77.3, 76.7, 69.3, 47.2.

**6j.** 3-(4-bromophenyl)-3-hydroxy-1-phenylpropan-1-one

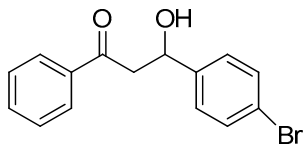

Colorless oil

$^1\text{H}$  NMR (400 MHz, Chloroform-d)  $\delta$  7.97 – 7.92 (m, 2H), 7.64 – 7.57 (m, 1H), 7.54 – 7.44 (m, 4H), 7.34 (s, 2H), 5.30 (s, 2H), 3.63 (d,  $J$  = 3.0 Hz, 1H), 3.41 – 3.24 (m, 2H).  
 $^{13}\text{C}$  NMR (101 MHz, Chloroform-d)  $\delta$  199.9, 141.9, 136.4, 133.8, 131.6, 128.7, 128.1, 127.5, 121.4, 69.4, 47.2.

**6k.** 3-(3-bromophenyl)-3-hydroxy-1-phenylpropan-1-one

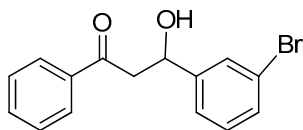

Colorless oil

$^1\text{H}$  NMR (400 MHz, Chloroform-d)  $\delta$  8.02 – 7.96 (m, 2H), 7.67 – 7.61 (m, 2H), 7.55 – 7.44 (m, 3H), 7.39 (dt,  $J$  = 7.9, 1.4 Hz, 1H), 7.31 – 7.27 (m, 1H), 5.36 (d,  $J$  = 4.6 Hz, 1H), 3.79 (d,  $J$  = 3.1 Hz, 1H), 3.56 – 3.15 (m, 2H).  
 $^{13}\text{C}$  NMR (101 MHz, Chloroform-d)  $\delta$  199.8, 145.2, 136.2, 133.7, 130.6, 130.1, 128.8, 128.7, 128.1, 124.3, 122.6, 69.2, 47.1.

**6l.** 3-Hydroxy-1-phenyl-3-(4-(trifluoromethyl)phenyl)propan-1-one

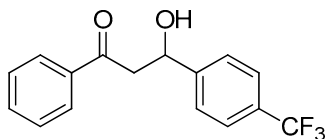

Colorless oil

$^1\text{H}$  NMR (400 MHz, Chloroform-d)  $\delta$  7.99 – 7.92 (m, 2H), 7.64 (d,  $J$  = 8.2 Hz, 2H), 7.58 (dd,  $J$  = 11.8, 7.8 Hz, 3H), 7.48 (t,  $J$  = 7.8 Hz, 2H), 7.37 (d,  $J$  = 5.8 Hz, 1H), 5.45 – 5.37 (m, 1H), 3.72 (d,  $J$  = 3.1 Hz, 1H), 3.46 – 3.29 (m, 3H).

$^{13}\text{C}$  NMR (101 MHz, Chloroform-d)  $\delta$  199.8, 146.9, 136.3, 133.8, 128.8, 128.1, 126.0, 125.5, 125.5, 69.4, 47.2.

**6m.** 3-(4-fluorophenyl)-3-hydroxy-1-(p-tolyl)propan-1-one

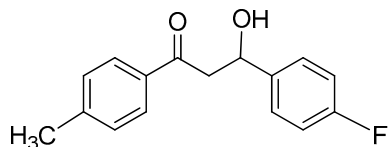

Colorless oil

$^1\text{H}$  NMR (400 MHz, Chloroform-d)  $\delta$  7.89 – 7.81 (m, 2H), 7.45 – 7.36 (m, 2H), 7.30 – 7.23 (m, 3H), 7.11 – 7.01 (m, 2H), 5.37 – 5.27 (m, 1H), 3.71 (d,  $J$  = 2.8 Hz, 1H), 3.41 – 3.22 (m, 2H), 2.42 (s, 3H).

$^{13}\text{C}$  NMR (101 MHz, Chloroform-d)  $\delta$  199.6, 163.3, 160.8, 144.6, 138.8, 138.7, 133.9, 129.3, 128.2, 127.4, 127.3, 115.3, 115.1, 77.3, 76.9, 76.6, 69.4, 47.1, 21.6.

**6n.** 3-Hydroxy-1,3-bis(4-methoxyphenyl)propan-1-one

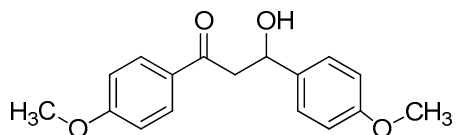

White solid

$^1\text{H}$  NMR (400 MHz, Chloroform-d)  $\delta$  7.97 – 7.88 (m, 2H), 7.42 – 7.32 (m, 2H), 6.91 (t,  $J$  = 8.4 Hz, 4H), 5.26 (td,  $J$  = 6.2, 2.5 Hz, 1H), 3.83 (d,  $J$  = 23.1 Hz, 6H), 3.72 (t,  $J$  = 2.4 Hz, 1H), 3.29 (d,  $J$  = 6.1 Hz, 2H).

$^{13}\text{C}$  NMR (101 MHz, Chloroform-d)  $\delta$  198.8, 163.9, 159.1, 135.3, 130.5, 129.7, 127.0, 113.9, 113.8, 69.8, 55.5, 55.3, 46.9.

**6o.** 3-(2-chlorophenyl)-3-hydroxy-1-(4-methoxyphenyl)propan-1-one

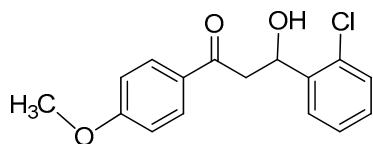

White solid

$^1\text{H}$  NMR (400 MHz, Chloroform- $d$ )  $\delta$  7.97 – 7.90 (m, 2H), 7.72 (dd,  $J$  = 7.6, 1.7 Hz, 1H), 7.37 – 7.30 (m, 2H), 7.23 (td,  $J$  = 7.6, 1.7 Hz, 1H), 6.95 – 6.89 (m, 2H), 5.66 (d,  $J$  = 9.7 Hz, 1H), 4.06 (dt,  $J$  = 3.1, 1.5 Hz, 1H), 3.86 (d,  $J$  = 0.9 Hz, 3H), 3.58 – 3.44 (m, 1H), 3.07 (dd,  $J$  = 17.5, 9.6 Hz, 1H).  
 $^{13}\text{C}$  NMR (101 MHz, Chloroform- $d$ )  $\delta$  198.8, 163.9, 140.4, 131.0, 130.5, 129.4, 129.2, 128.4, 127.2, 127.2, 113.8, 66.9, 55.7, 44.7.

**6p.** 3-(4-bromophenyl)-3-hydroxy-1-(4-methoxyphenyl)propan-1-one

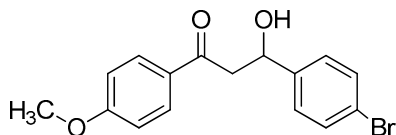

White solid

$^1\text{H}$  NMR (400 MHz, Chloroform- $d$ )  $\delta$  7.92 (d,  $J$  = 9.0 Hz, 2H), 7.50 (d,  $J$  = 8.5 Hz, 2H), 7.32 (d,  $J$  = 8.2 Hz, 2H), 6.94 (d,  $J$  = 9.0 Hz, 2H), 5.32 – 5.25 (m, 1H), 3.88 (s, 3H), 3.80 (d,  $J$  = 2.9 Hz, 1H), 3.37 – 3.18 (m, 2H).  
 $^{13}\text{C}$  NMR (101 MHz, Chloroform- $d$ )  $\delta$  198.4, 163.9, 142.1, 131.5, 130.5, 129.4, 127.4, 121.2, 113.8, 69.5, 55.4, 46.6.

**6q.** 1-(4-fluorophenyl)-3-hydroxy-3-(4-methoxyphenyl)propan-1-one

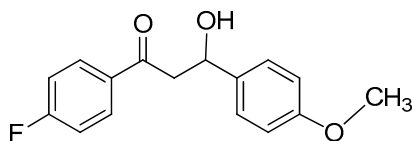

White solid

$^1\text{H}$  NMR (400 MHz, Chloroform- $d$ )  $\delta$  8.01 – 7.93 (m, 2H), 7.39 – 7.32 (m, 2H), 7.17 – 7.08 (m, 2H), 6.94 – 6.86 (m, 2H), 5.28 (d,  $J$  = 8.8 Hz, 1H), 3.81 (s, 3H), 3.51 – 3.44 (m, 1H), 3.40 – 3.22 (m, 2H).  
 $^{13}\text{C}$  NMR (101 MHz, Chloroform- $d$ )  $\delta$  198.5, 167.3, 164.7, 159.1, 135.0, 133.1, 133.0, 130.9, 130.8, 127.0, 115.9, 115.7, 113.9, 69.6, 55.3, 47.3, 29.7.

**6r.** 3-(4-chlorophenyl)-1-(4-fluorophenyl)-3-hydroxypropan-1-one

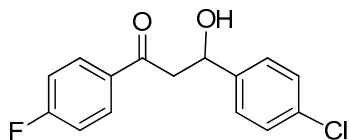

Colorless oil

$^1\text{H}$  NMR (400 MHz, Chloroform- $d$ )  $\delta$  8.02 – 7.92 (m, 2H), 7.35 (dd,  $J$  = 3.2, 1.6 Hz, 4H), 7.14 (t,  $J$  = 8.4 Hz, 2H), 5.31 (t,  $J$  = 6.1 Hz, 1H), 3.60 (d,  $J$  = 6.4 Hz, 1H), 3.36 – 3.23 (m, 2H).  
 $^{13}\text{C}$  NMR (101 MHz, Chloroform- $d$ )  $\delta$  198.2, 167.3, 164.8, 141.2, 133.3, 132.8, 132.8, 130.8, 130.7, 128.7, 127.1, 116.0, 115.8, 69.3, 47.1.

**6s.** 3-(4-bromophenyl)-1-(4-fluorophenyl)-3-hydroxypropan-1-one

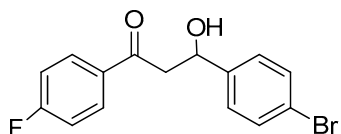

Colorless oil

$^1\text{H}$  NMR (400 MHz, Chloroform- $d$ )  $\delta$  7.98 (ddd,  $J$  = 8.8, 5.3, 1.4 Hz, 2H), 7.51 (dd,  $J$  = 8.3, 1.4 Hz, 2H), 7.32 (dd,  $J$  = 8.3, 1.3 Hz, 2H), 7.14 (td,  $J$  = 8.6, 1.4 Hz, 2H), 5.31 (d,  $J$  = 3.2 Hz, 1H), 3.55 (dd,  $J$  = 3.0, 1.2 Hz, 1H), 3.31 (dd,  $J$  = 5.8, 1.1 Hz, 2H).

$^{13}\text{C}$  NMR (101 MHz, Chloroform- $d$ )  $\delta$  197.9, 167.2, 164.7, 141.9, 132.8, 132.8, 131.5, 130.8, 130.7, 127.4, 121.3, 115.9, 115.7, 69.2, 47.1.

**6t.** 4-Hydroxy-4-phenylbutan-2-one

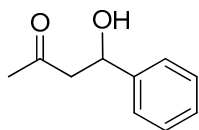

Colorless oil

$^1\text{H}$  NMR (400 MHz, Chloroform- $d$ )  $\delta$  7.29 – 7.24 (m, 4H), 7.22 – 7.17 (m, 1H), 5.06 (dd,  $J$  = 9.1, 3.4 Hz, 1H), 3.26 (s, 1H), 2.88 – 2.65 (m, 2H), 2.10 (s, 3H).

$^{13}\text{C}$  NMR (101 MHz, Chloroform- $d$ )  $\delta$  208.9, 142.7, 128.4, 127.6, 125.5, 69.8, 51.9, 30.7.

**6u.** 1-Hydroxy-4,4-dimethyl-1-phenylpentan-3-one

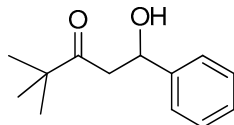

Colorless oil

$^1\text{H}$  NMR (400 MHz, Chloroform- $d$ )  $\delta$  7.29 – 7.21 (m, 4H), 7.20 – 7.14 (m, 1H), 5.03 (d,  $J$  = 3.0 Hz, 1H), 3.47 (d,  $J$  = 3.0 Hz, 1H), 2.81 – 2.73 (m, 2H), 1.03 (s, 9H).

$^{13}\text{C}$  NMR (101 MHz, Chloroform- $d$ )  $\delta$  216.7, 143.0, 128.4, 127.4, 125.6, 70.0, 45.4, 44.3, 26.1.

**6v.** 3-Hydroxy-3-(naphthalen-1-yl)-1-phenylpropan-1-one

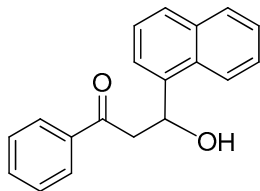

White solid

$^1\text{H}$  NMR (400 MHz, Chloroform- $d$ )  $\delta$  8.09 – 8.03 (m, 1H), 7.99 – 7.93 (m, 2H), 7.92 – 7.87 (m, 1H), 7.84 – 7.78 (m, 2H), 7.63 – 7.41 (m, 6H), 6.16 (dt,  $J$  = 9.3, 2.5 Hz, 1H), 3.76 (d,  $J$  = 2.8 Hz, 1H), 3.62 – 3.38 (m, 2H).



$^{13}\text{C}$  NMR (101 MHz, Chloroform-d)  $\delta$  200.3, 138.4, 136.4, 133.7, 133.6, 129.8, 129.0, 128.6, 128.1, 128.0, 126.2, 125.6, 125.5, 123.1, 122.7, 66.7, 46.7.

**6w.** 3-hydroxy-1-phenyl-3-(thiophen-2-yl)propan-1-one

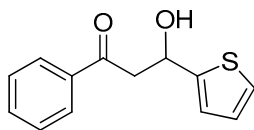

Colorless oil

$^1\text{H}$  NMR (400 MHz, Chloroform-d)  $\delta$  8.00 – 7.91 (m, 2H), 7.62 – 7.53 (m, 1H), 7.46 (t,  $J$  = 7.6 Hz, 2H), 7.28 – 7.21 (m, 1H), 7.02 (dd,  $J$  = 3.5, 1.1 Hz, 1H), 6.97 (dd,  $J$  = 4.9, 3.6 Hz, 1H), 5.64 – 5.52 (m, 1H), 3.77 – 3.69 (m, 1H), 3.57 – 3.41 (m, 2H).

$^{13}\text{C}$  NMR (101 MHz, Chloroform-d)  $\delta$  199.4, 146.6, 136.3, 133.6, 128.6, 128.0, 126.6, 124.6, 123.5, 66.4, 47.1.

**6x** 3-Hydroxy-3-(thiophen-2-yl)-1-(m-tolyl)propan-1-one

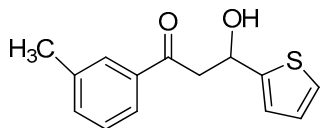

Colorless oil

$^1\text{H}$  NMR (400 MHz, Chloroform-d)  $\delta$  7.79 – 7.73 (m, 2H), 7.44 – 7.33 (m, 2H), 7.30 – 7.25 (m, 1H), 7.06 – 7.02 (m, 1H), 6.99 (dd,  $J$  = 5.0, 3.5 Hz, 1H), 5.60 (s, 1H), 3.81 (s, 1H), 3.57 – 3.43 (m, 2H), 2.42 (s, 3H).

$^{13}\text{C}$  NMR (101 MHz, Chloroform-d)  $\delta$  199.8, 146.6, 138.5, 136.4, 134.5, 128.6, 128.6, 126.7, 125.3, 124.6, 123.5, 66.4, 47.1, 21.3.

**6y.** 1-(4-fluorophenyl)-3-hydroxy-3-(thiophen-2-yl)propan-1-one

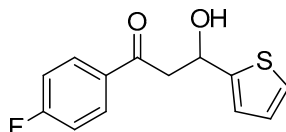

Colorless oil

$^1\text{H}$  NMR (400 MHz, Chloroform-d)  $\delta$  8.00 (dd,  $J$  = 8.7, 5.5 Hz, 2H), 7.30 – 7.25 (m, 1H), 7.15 (t,  $J$  = 8.6 Hz, 2H), 7.04 (d,  $J$  = 3.4 Hz, 1H), 6.99 (dd,  $J$  = 5.1, 3.6 Hz, 1H), 5.60 (d,  $J$  = 7.2 Hz, 1H), 3.64 (d,  $J$  = 3.1 Hz, 1H), 3.56 – 3.39 (m, 2H), 1.26 (s, 1H).

$^{13}\text{C}$  NMR (101 MHz, Chloroform-d)  $\delta$  197.8, 167.3, 164.8, 146.5, 132.9, 130.9, 130.8, 126.7, 124.7, 123.5, 116.0, 115.7, 66.5, 47.1, 29.7.

**6z** 3-Hydroxy-1,5-diphenylpent-4-en-1-one



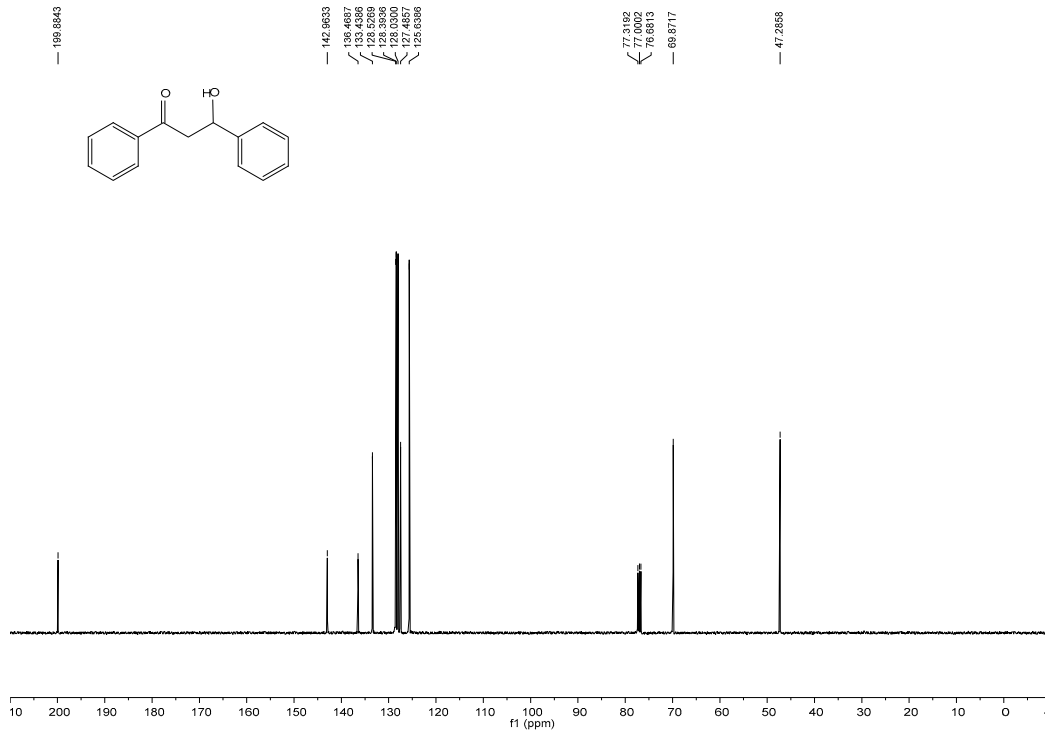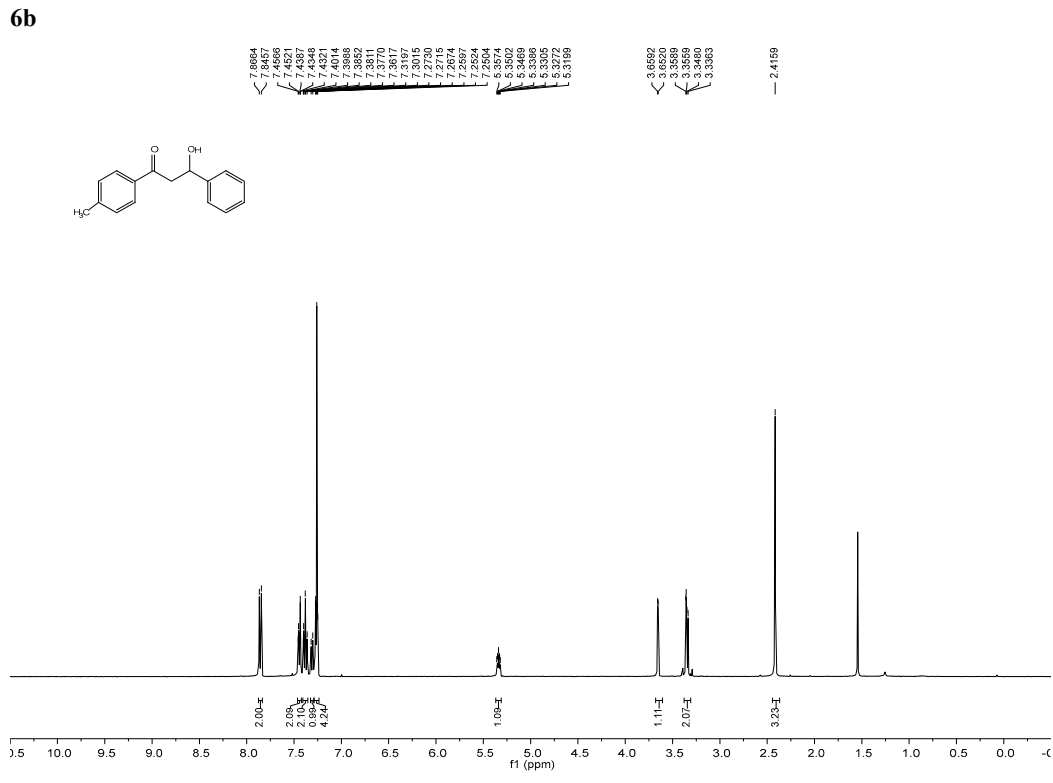

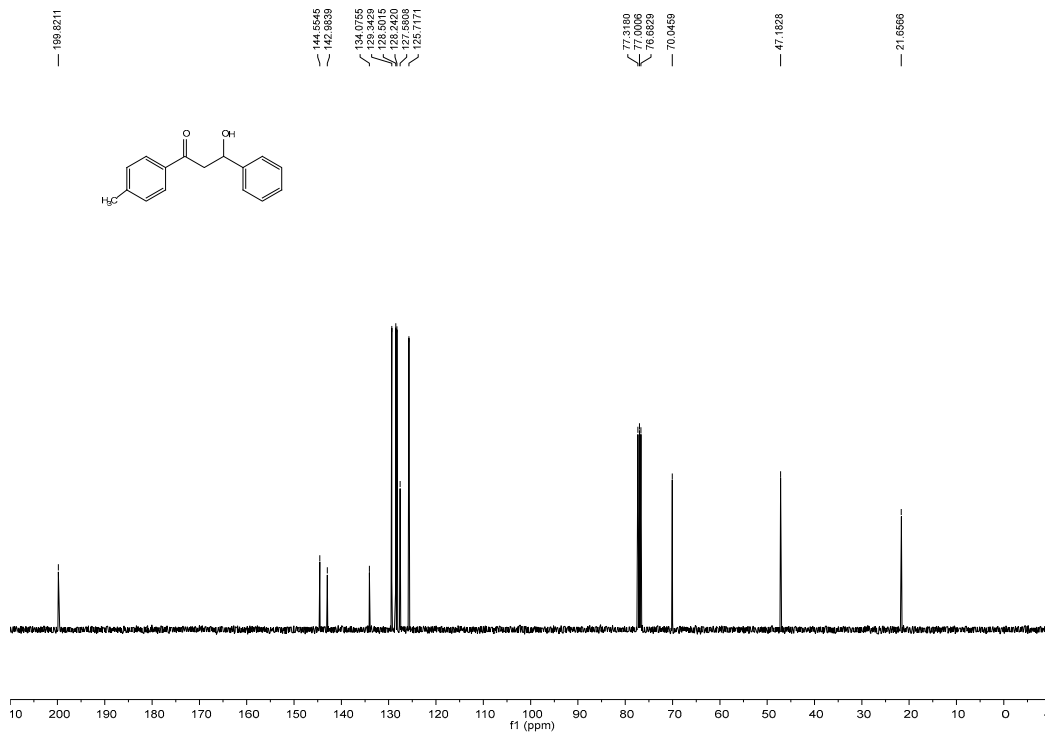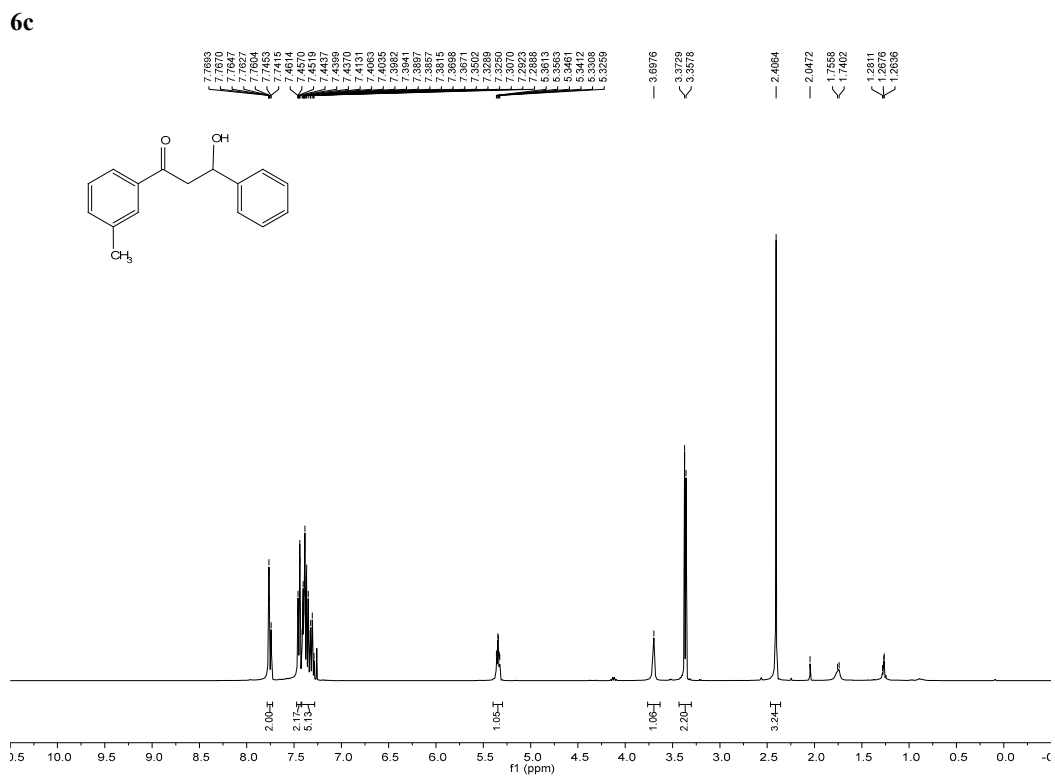

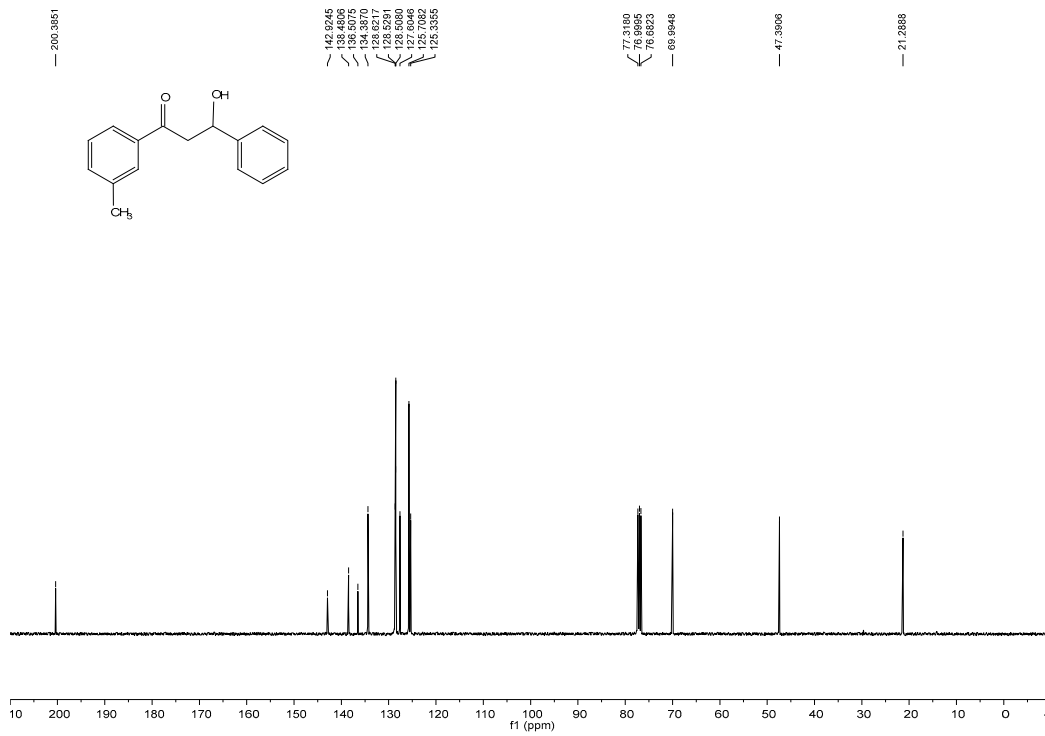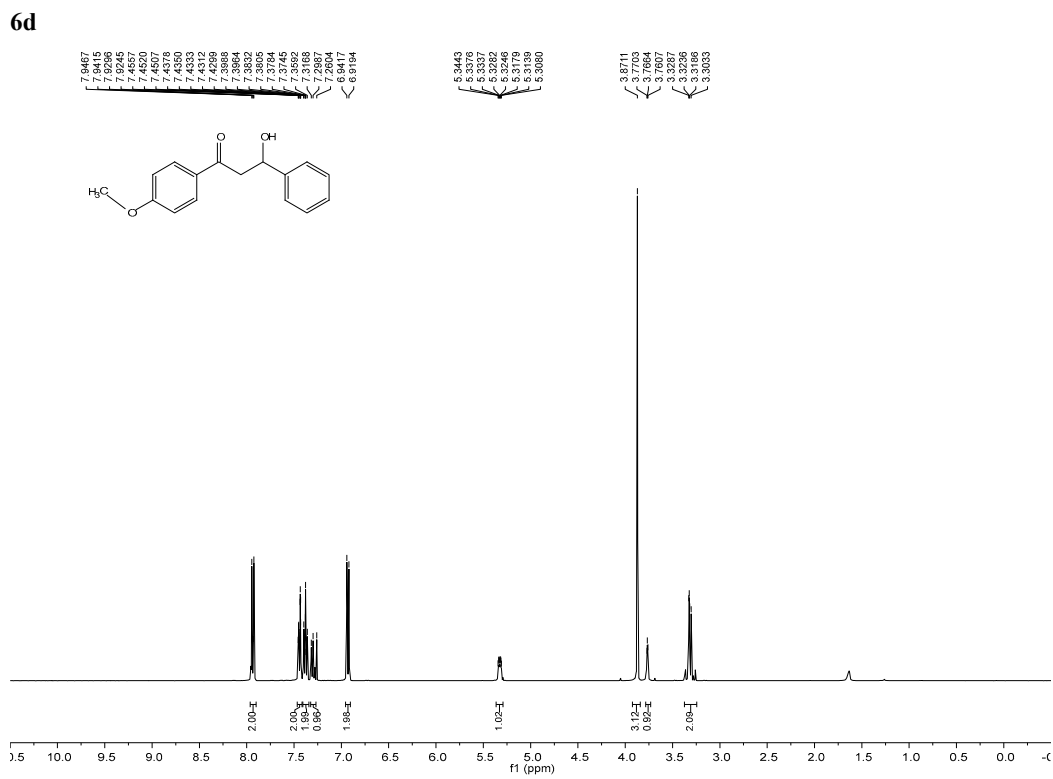

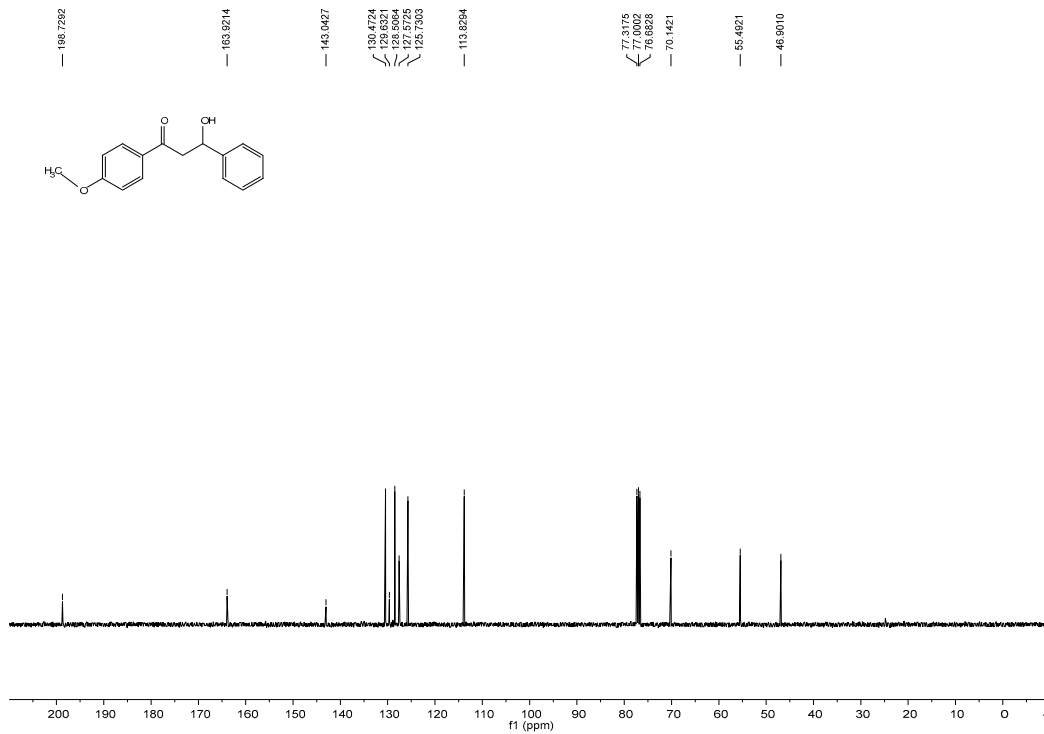

6e.

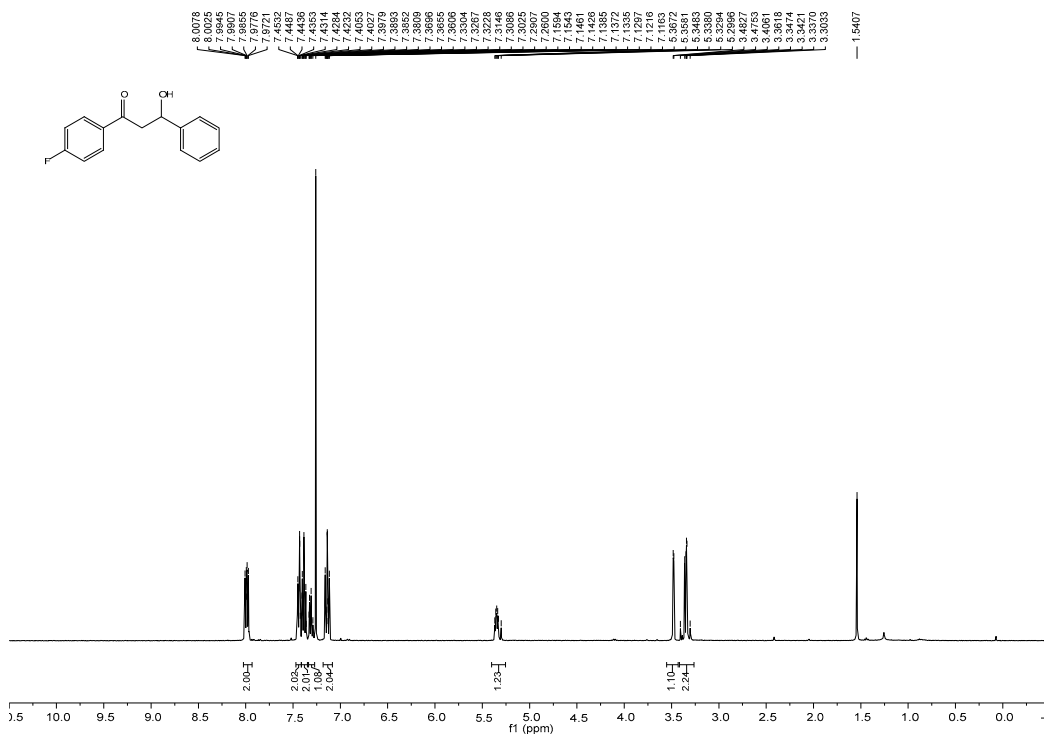

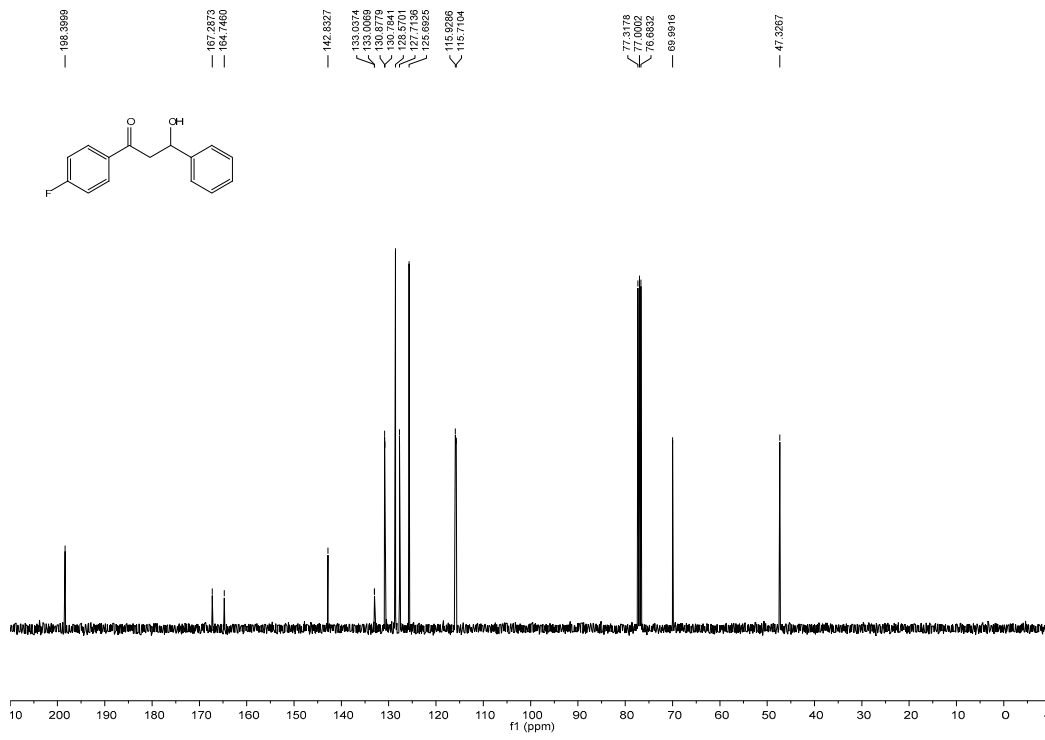

6f

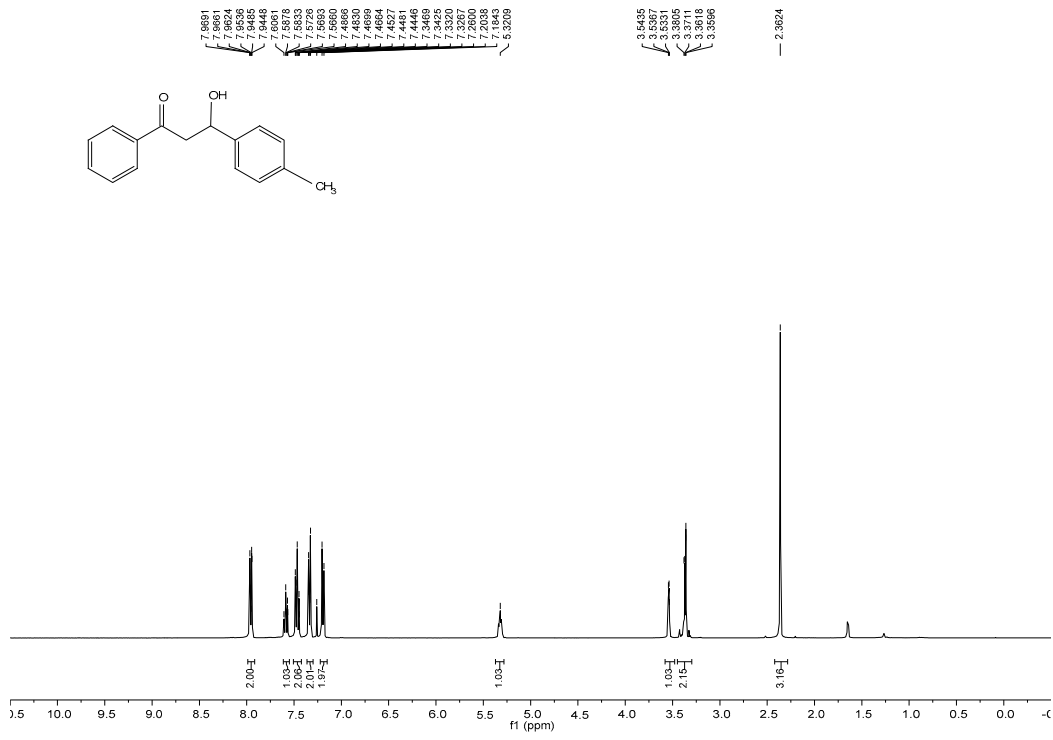

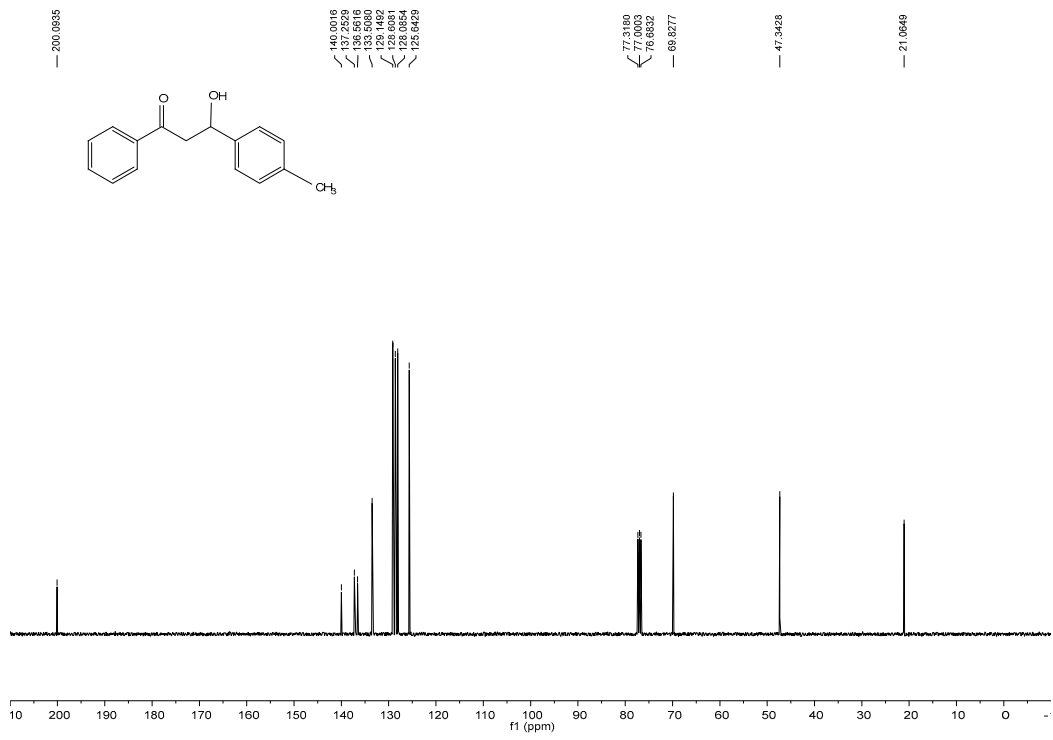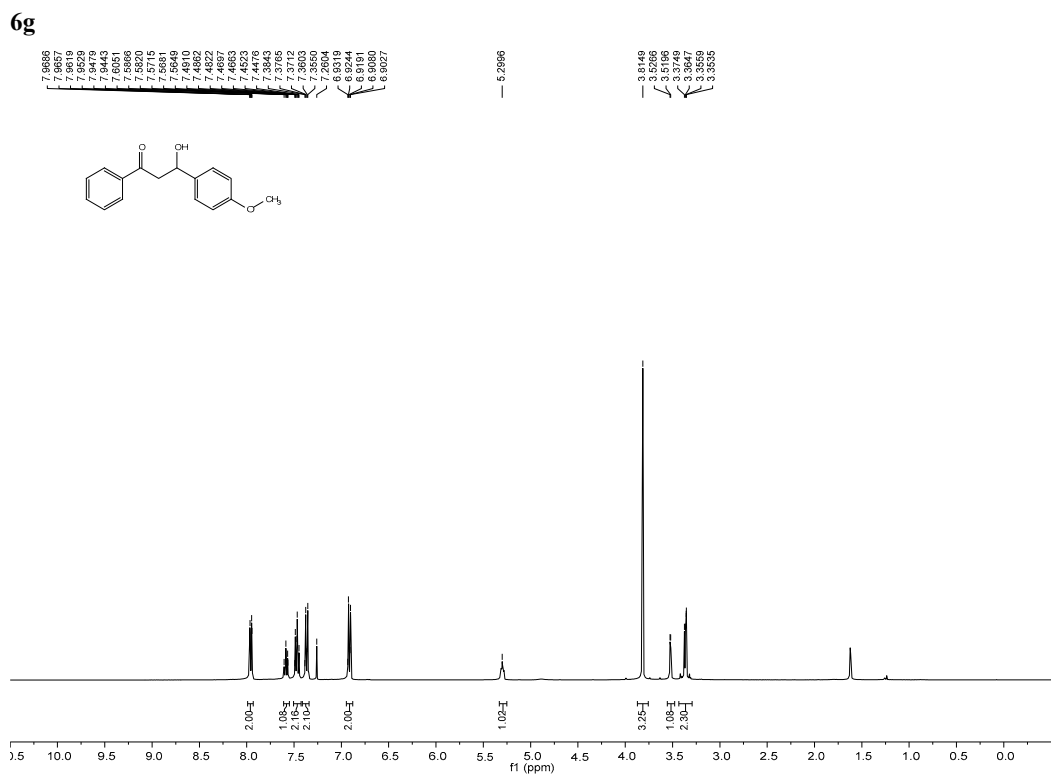



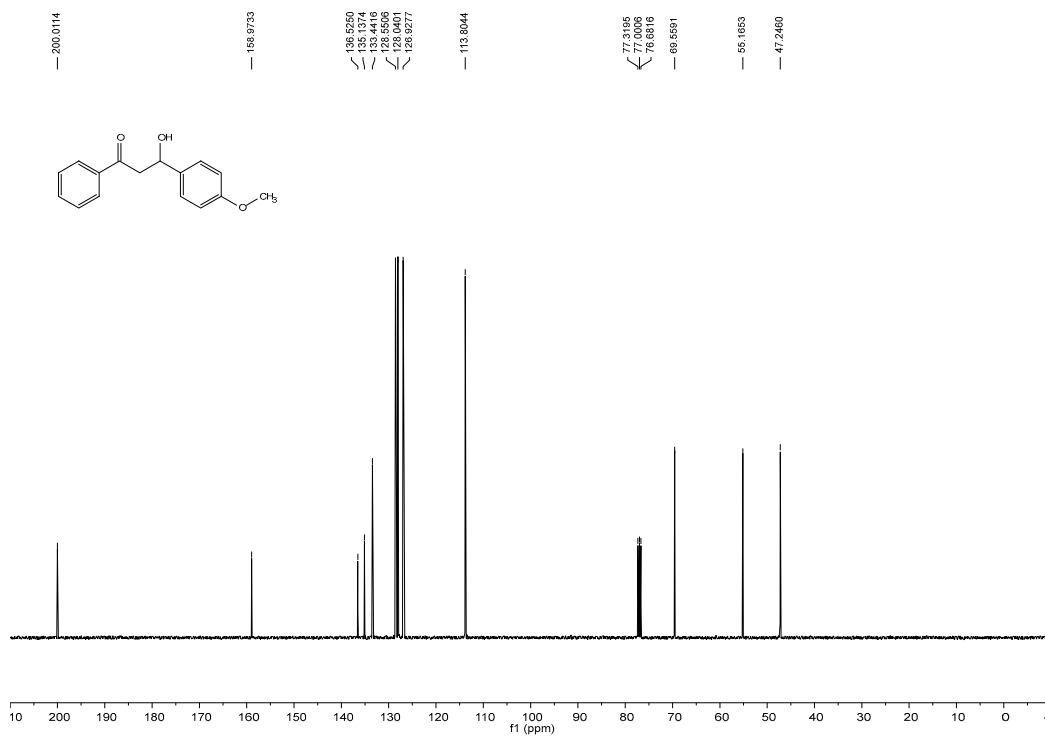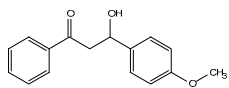

6h

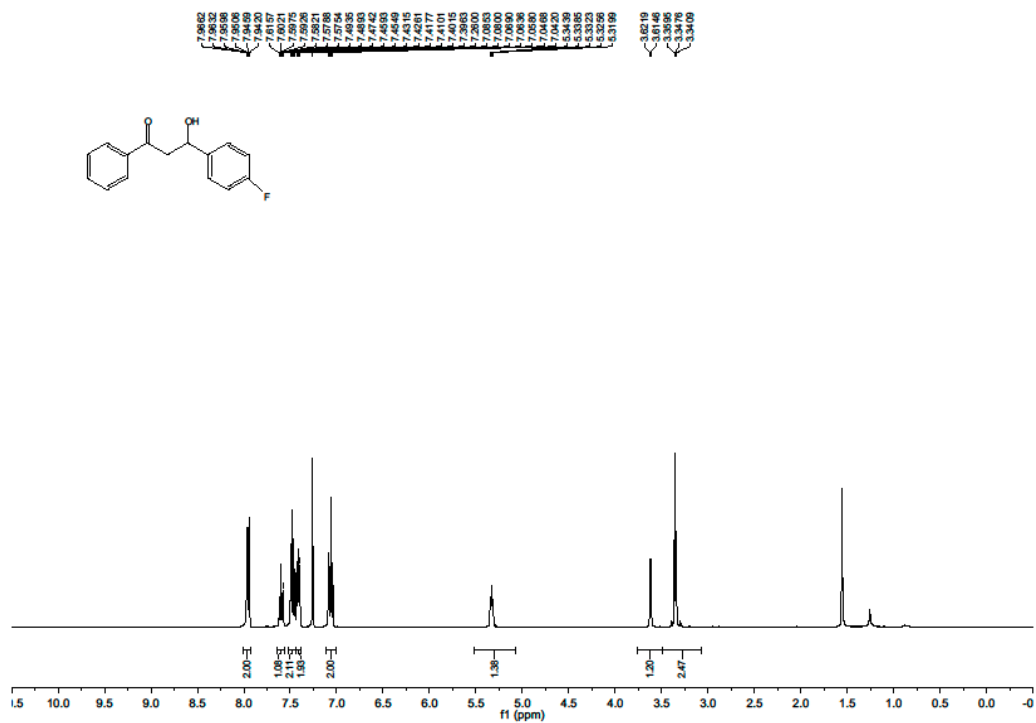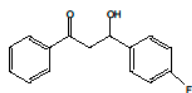

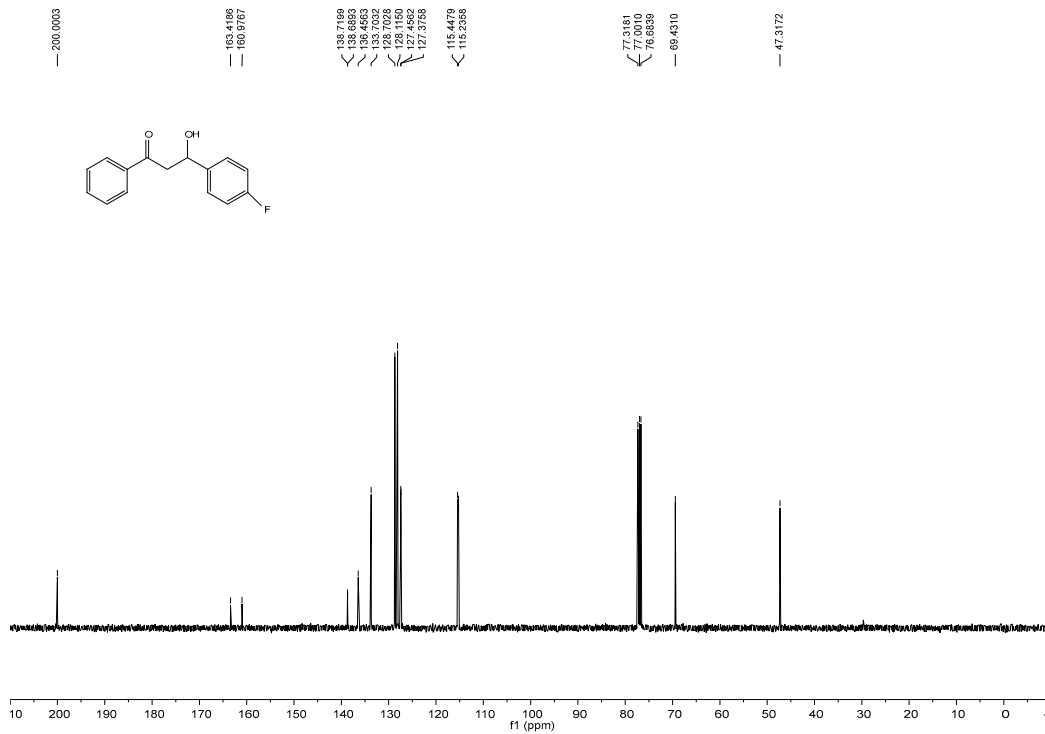

6i

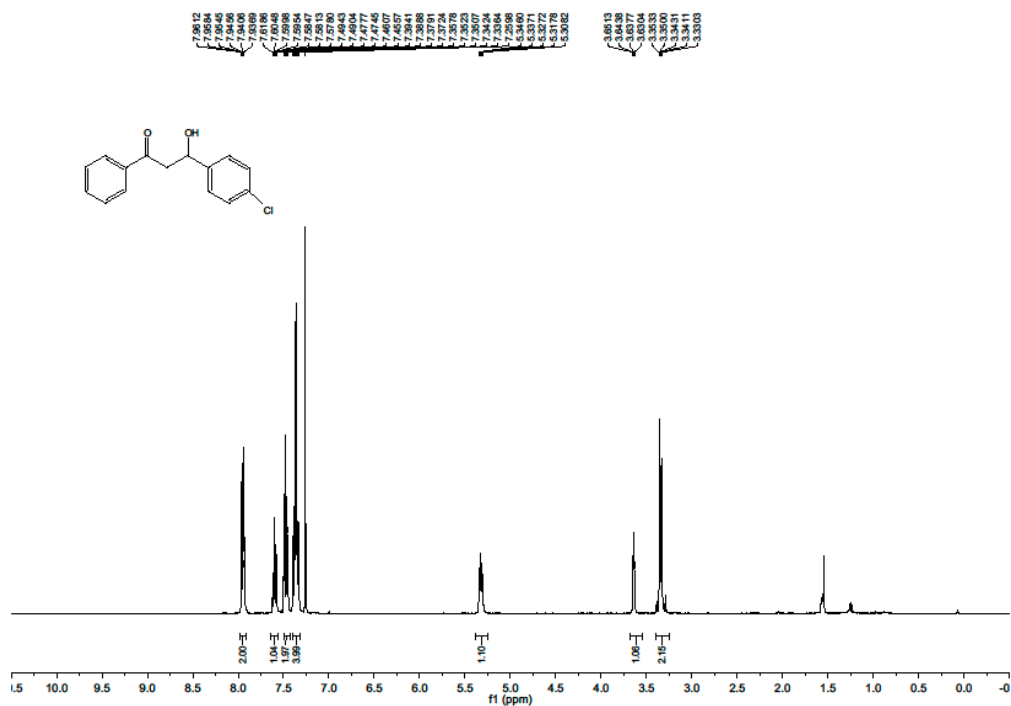

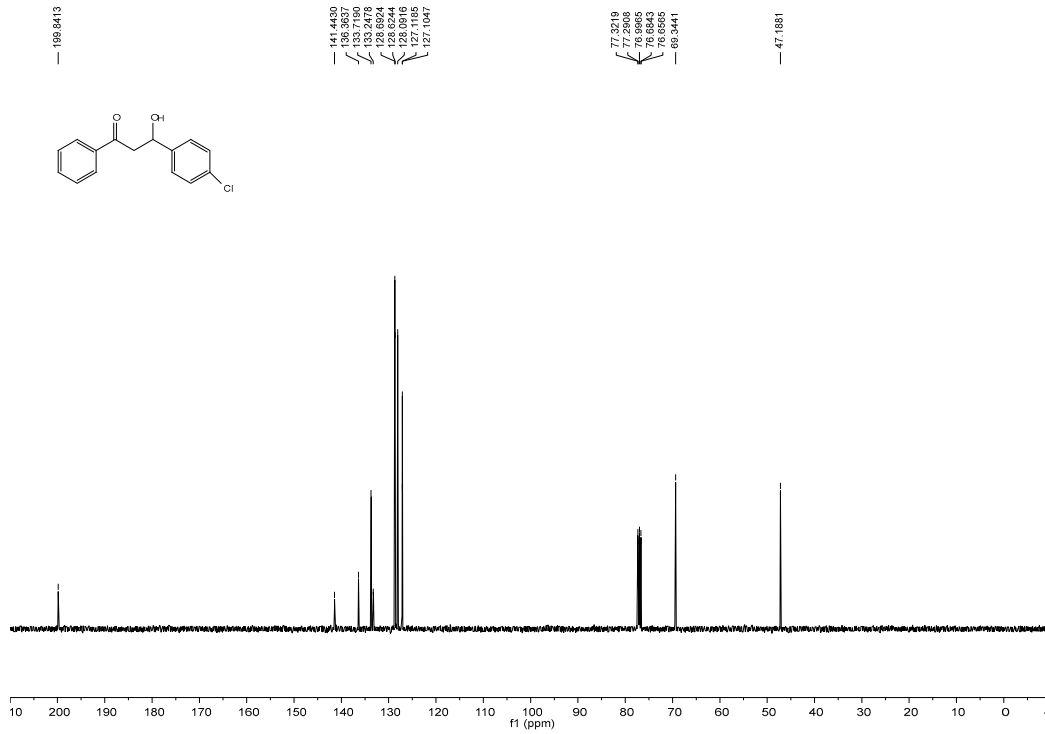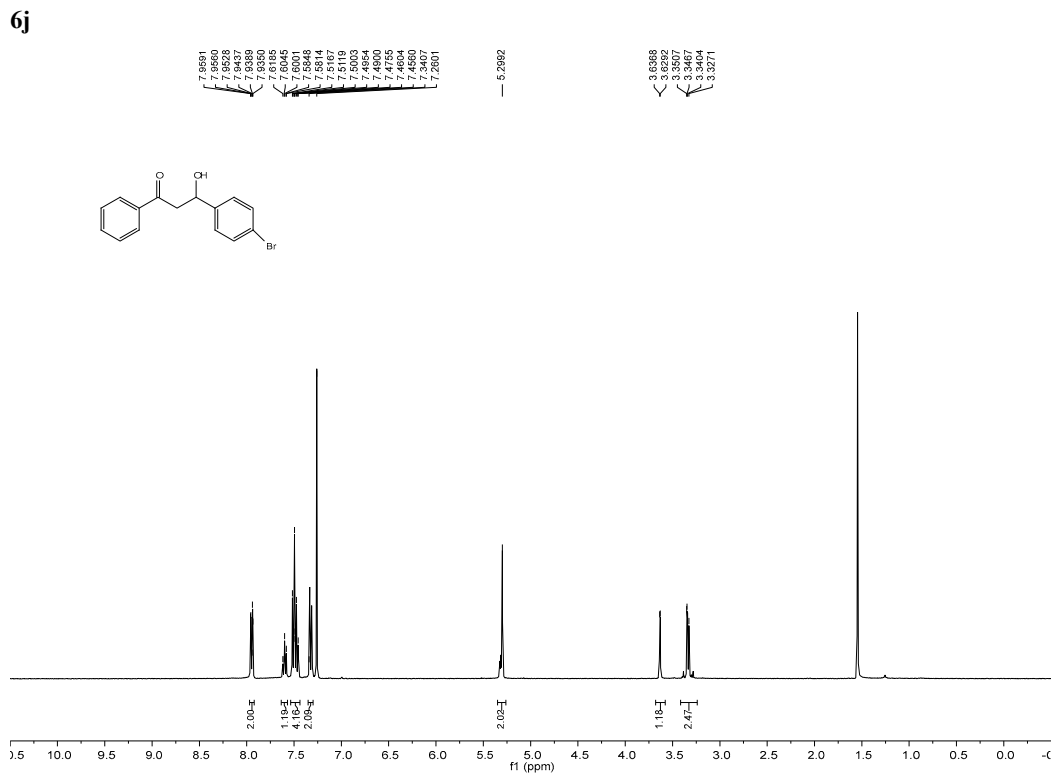

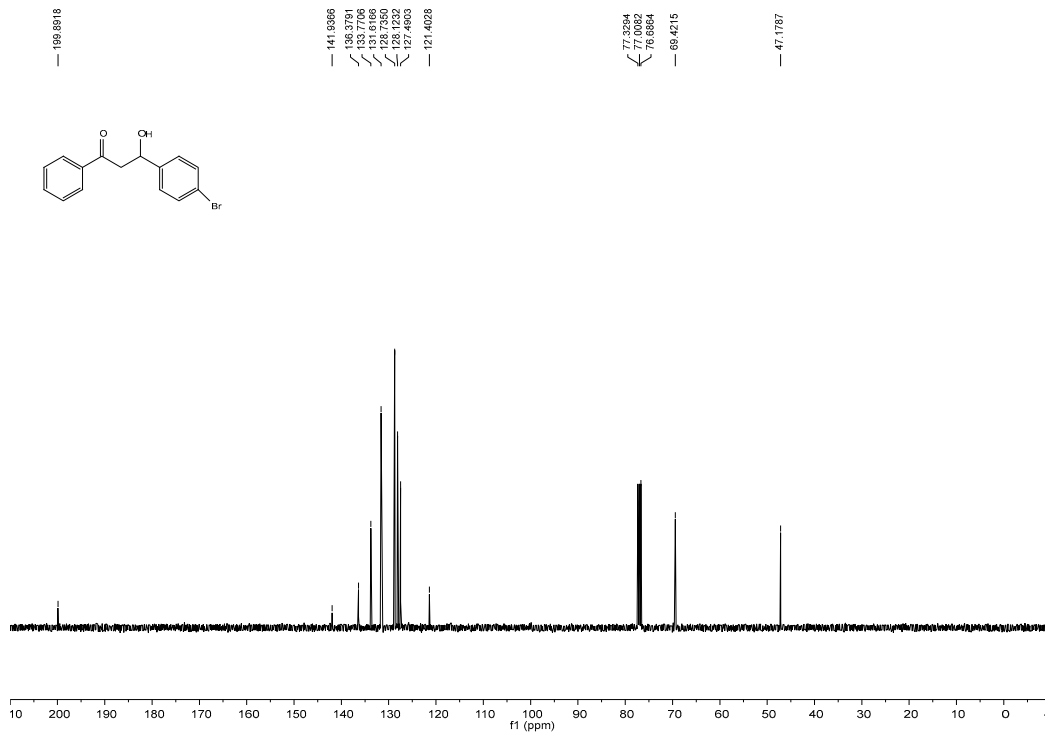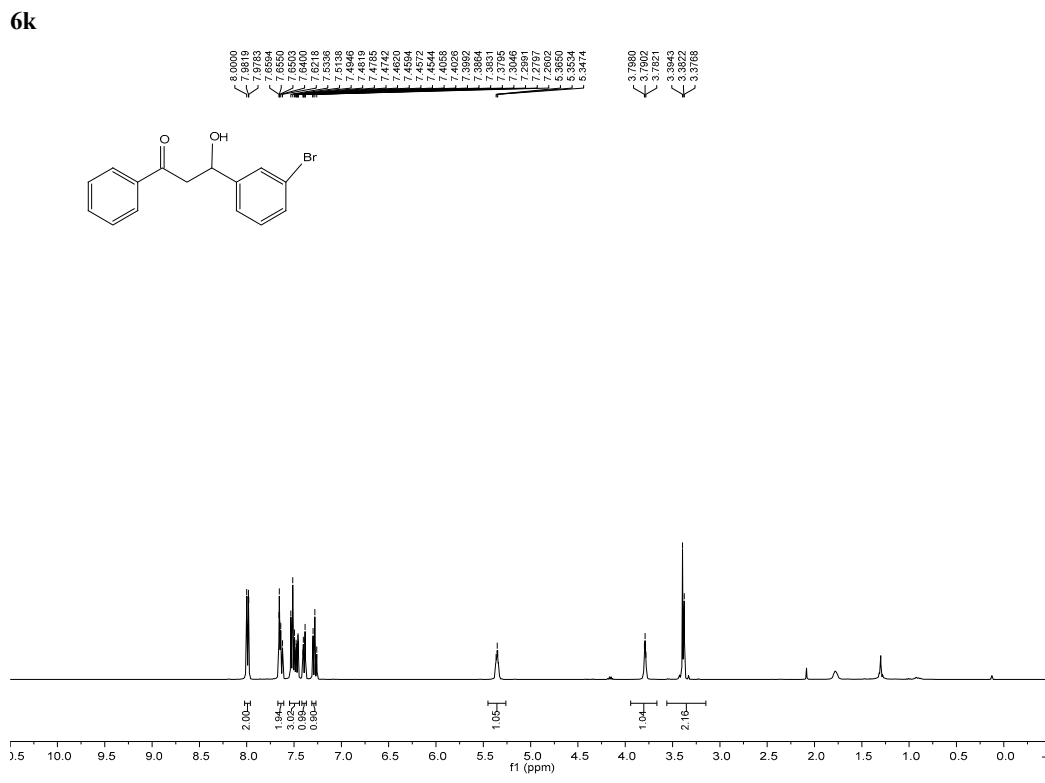

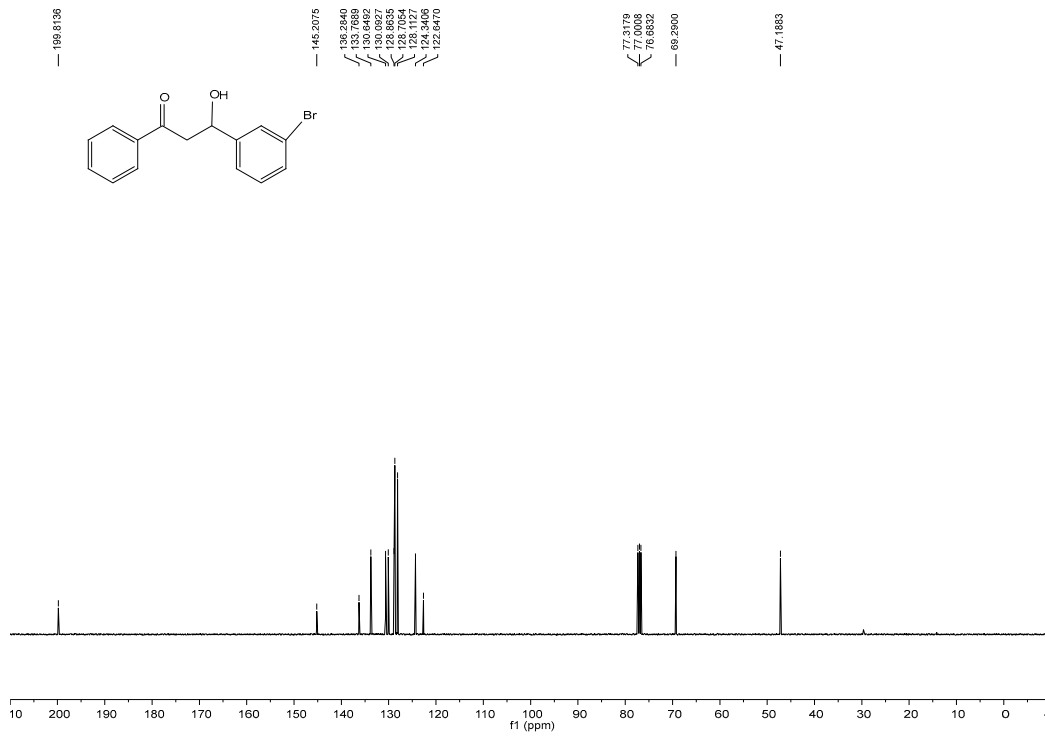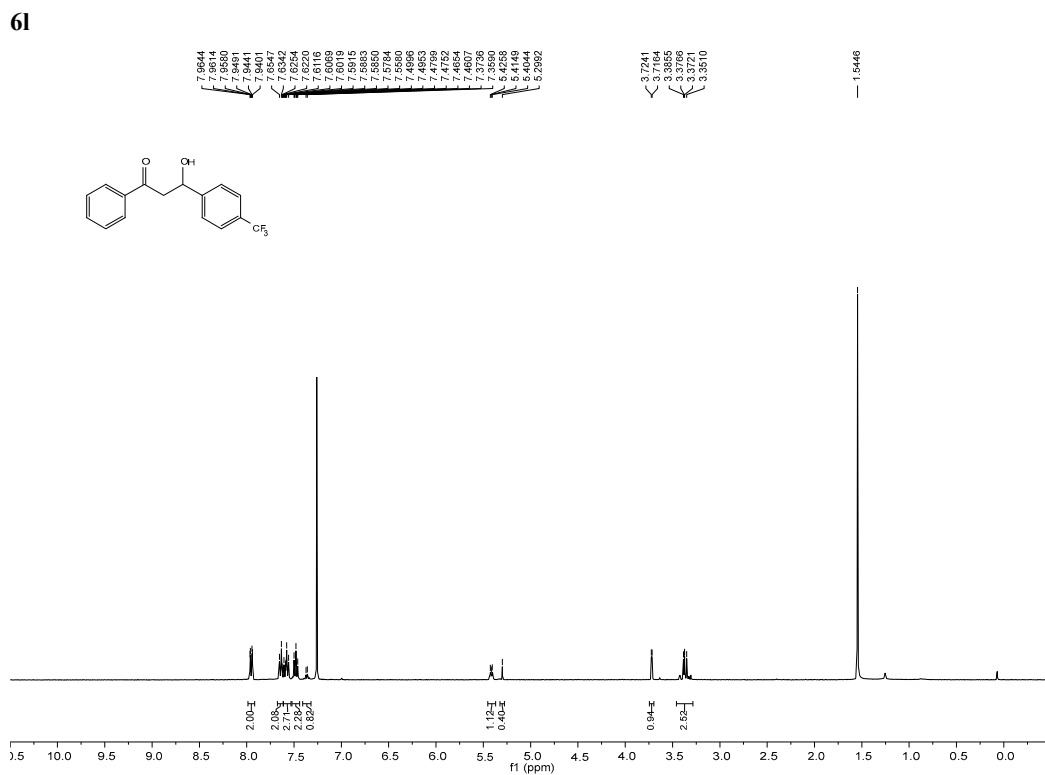

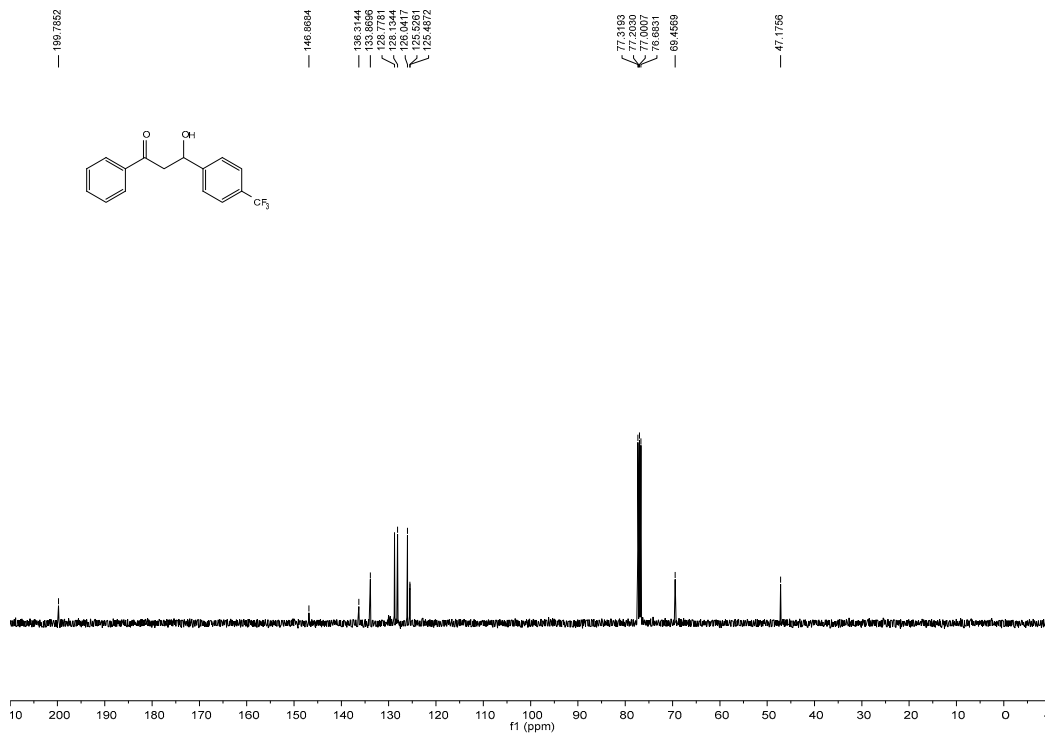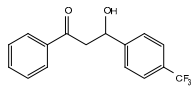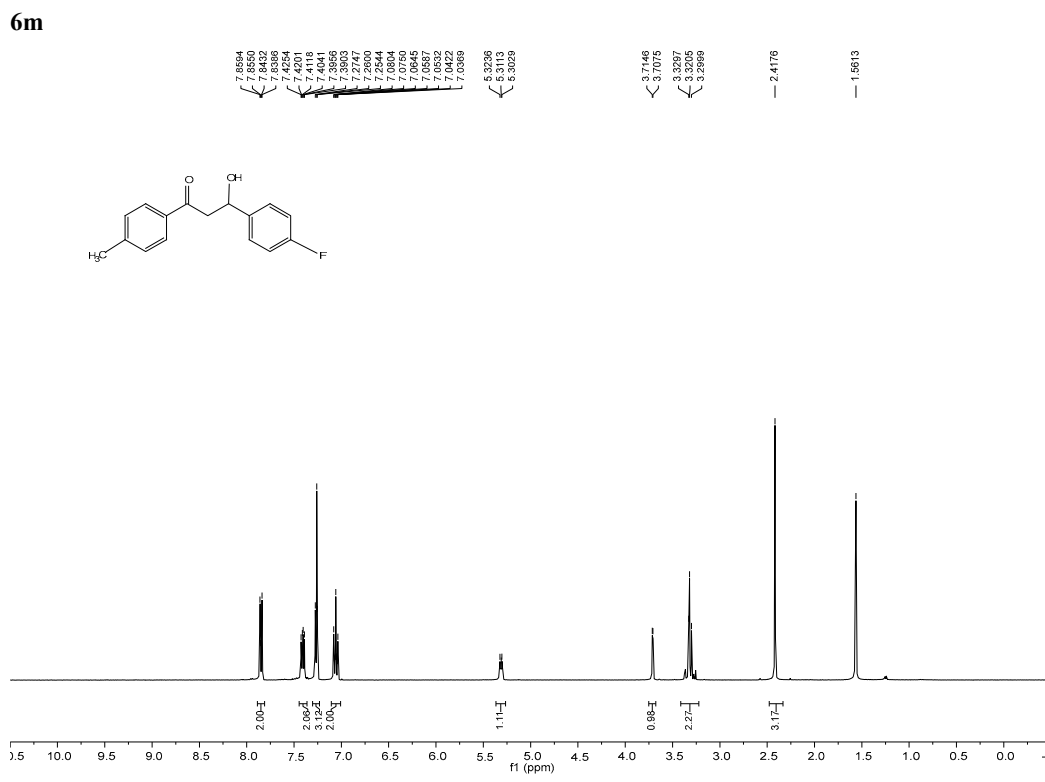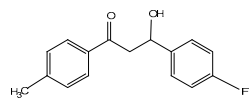

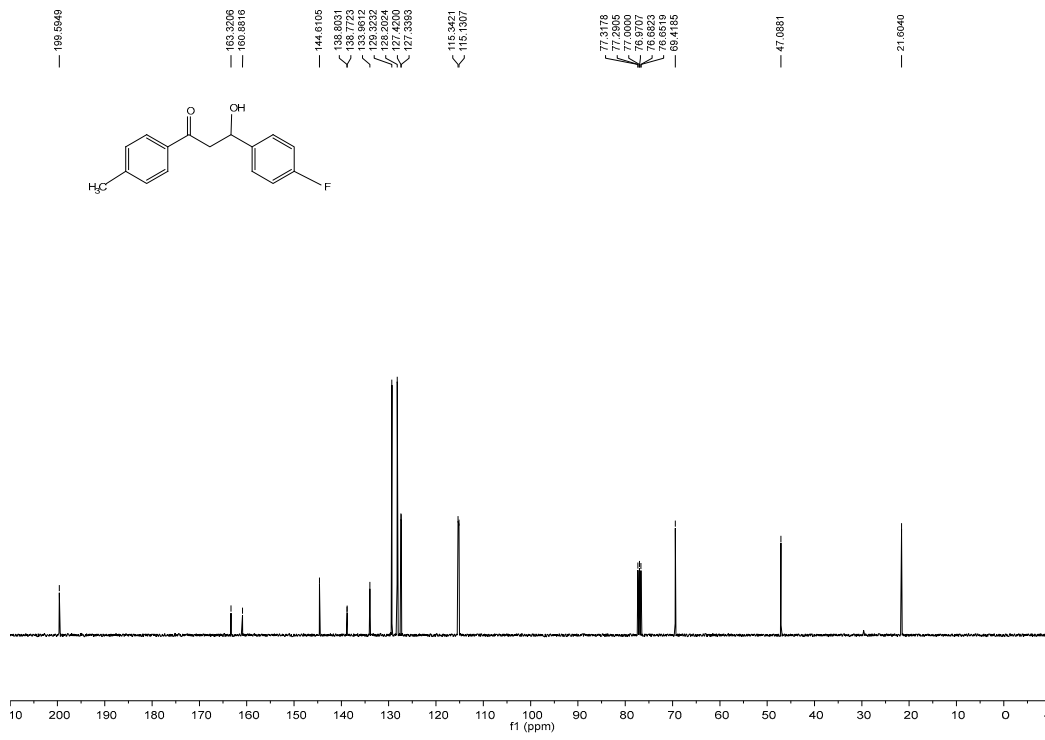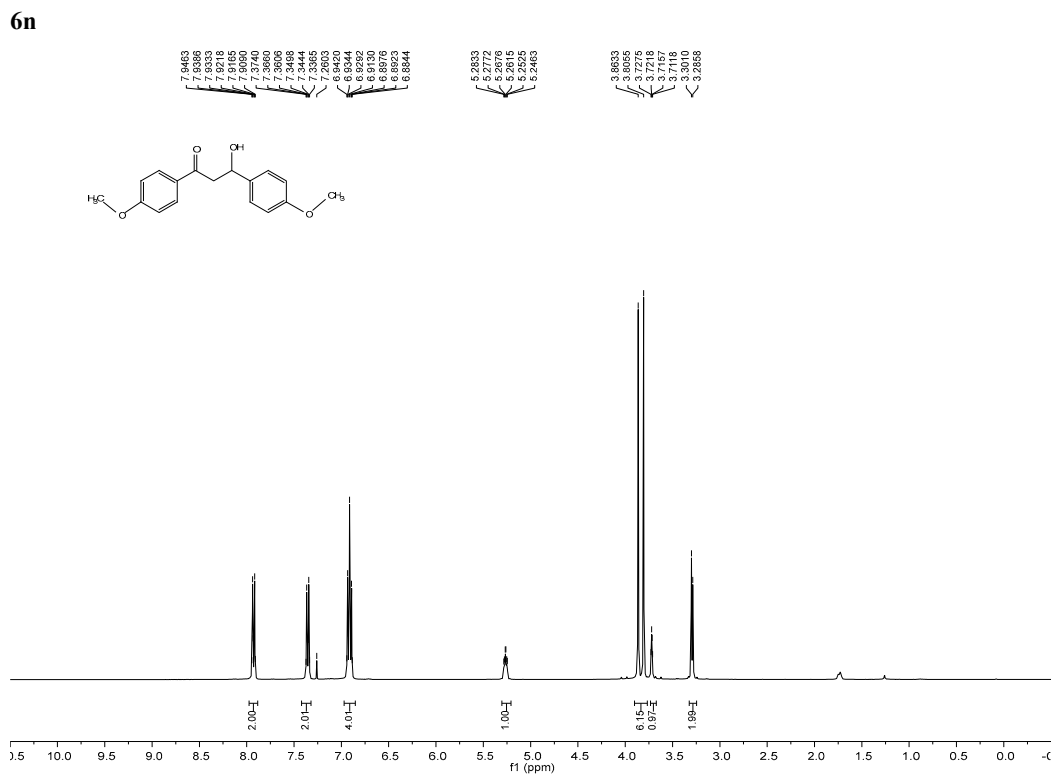

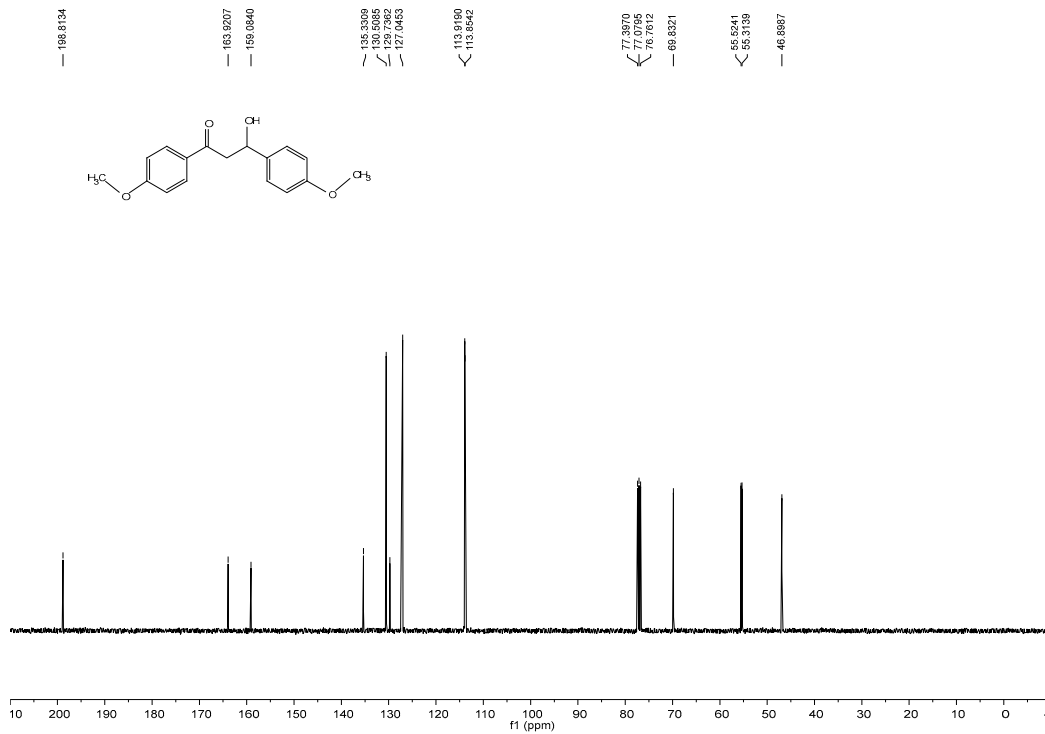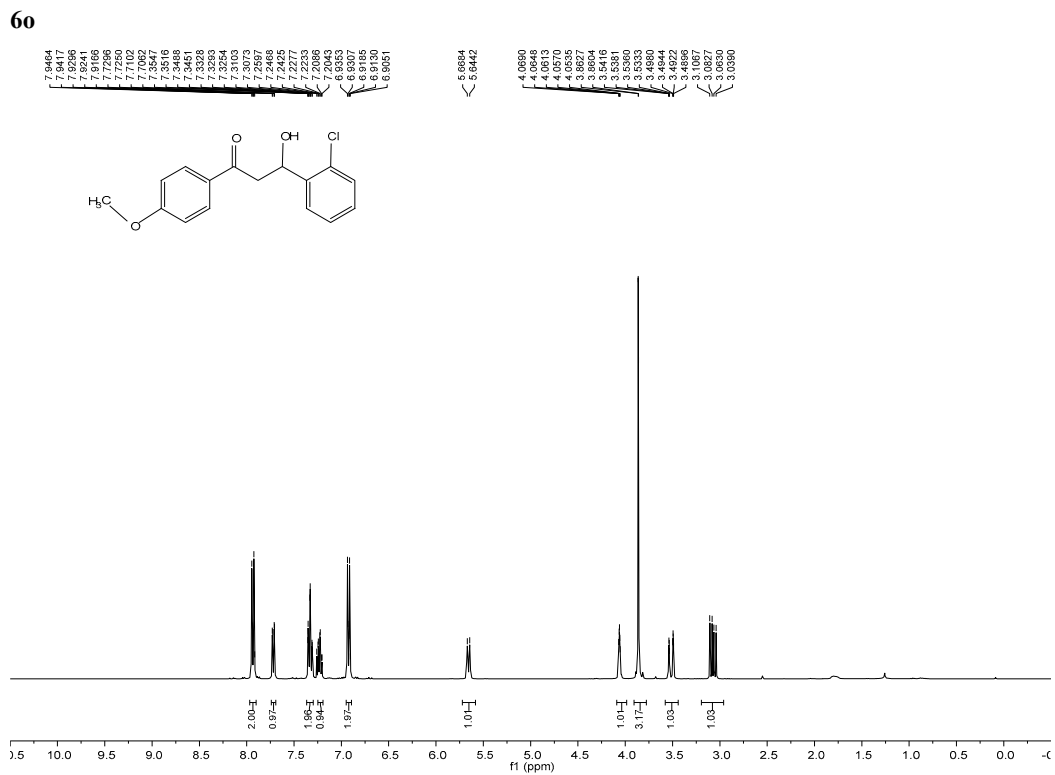



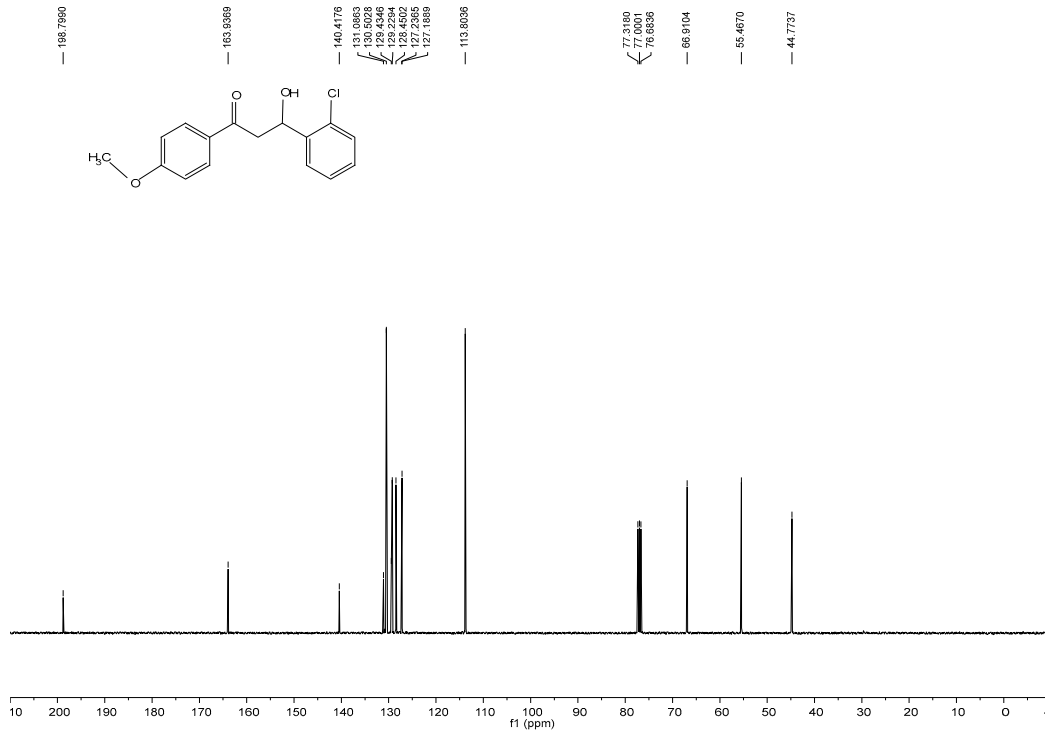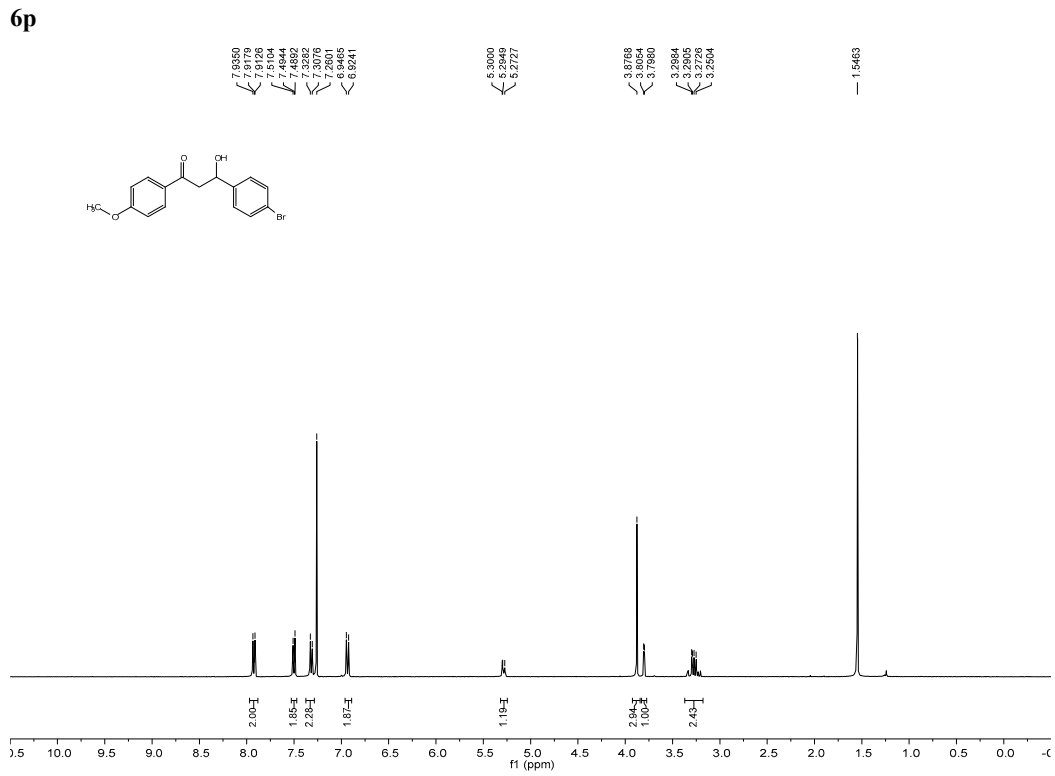

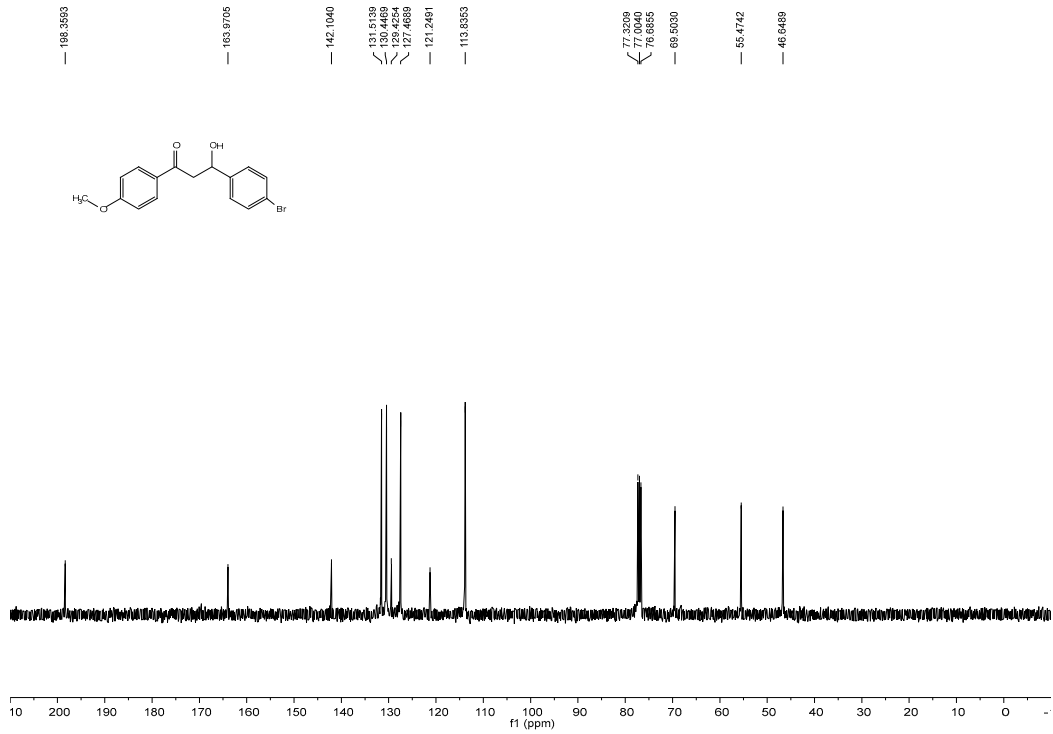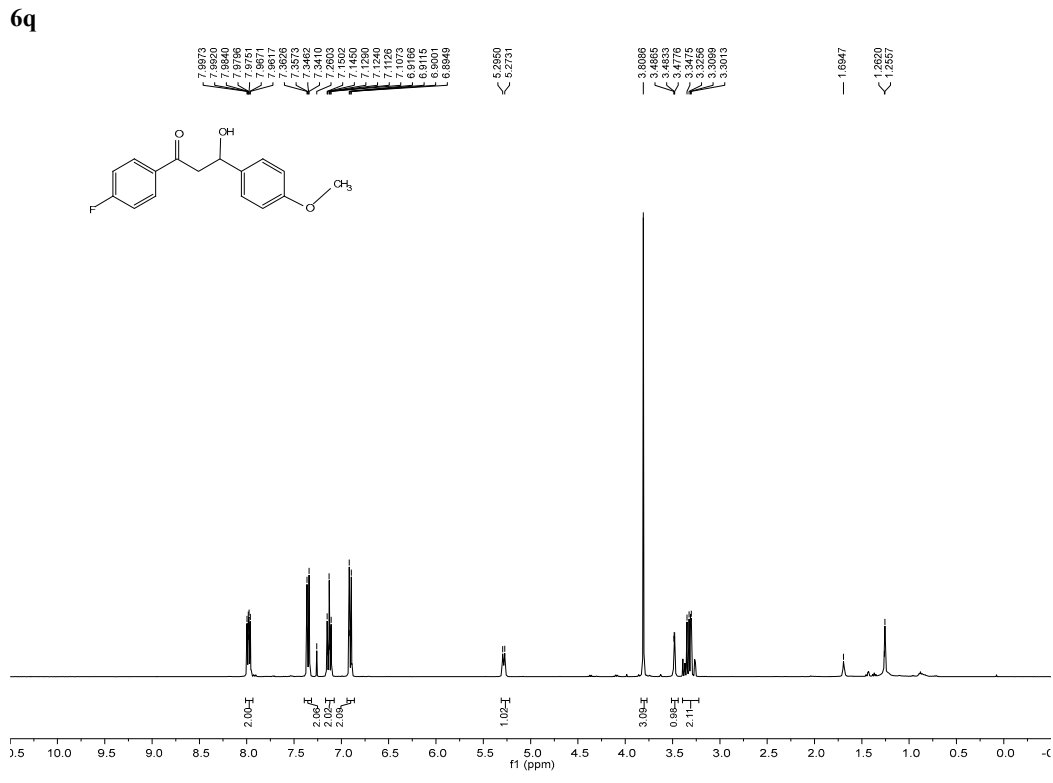

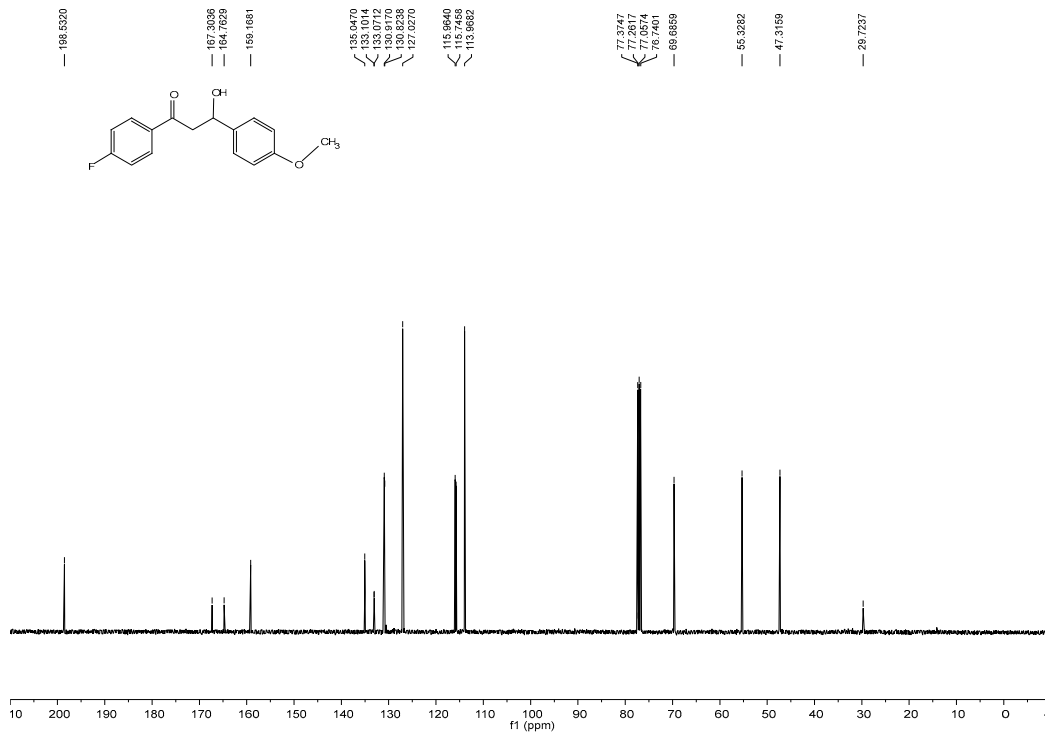

6r

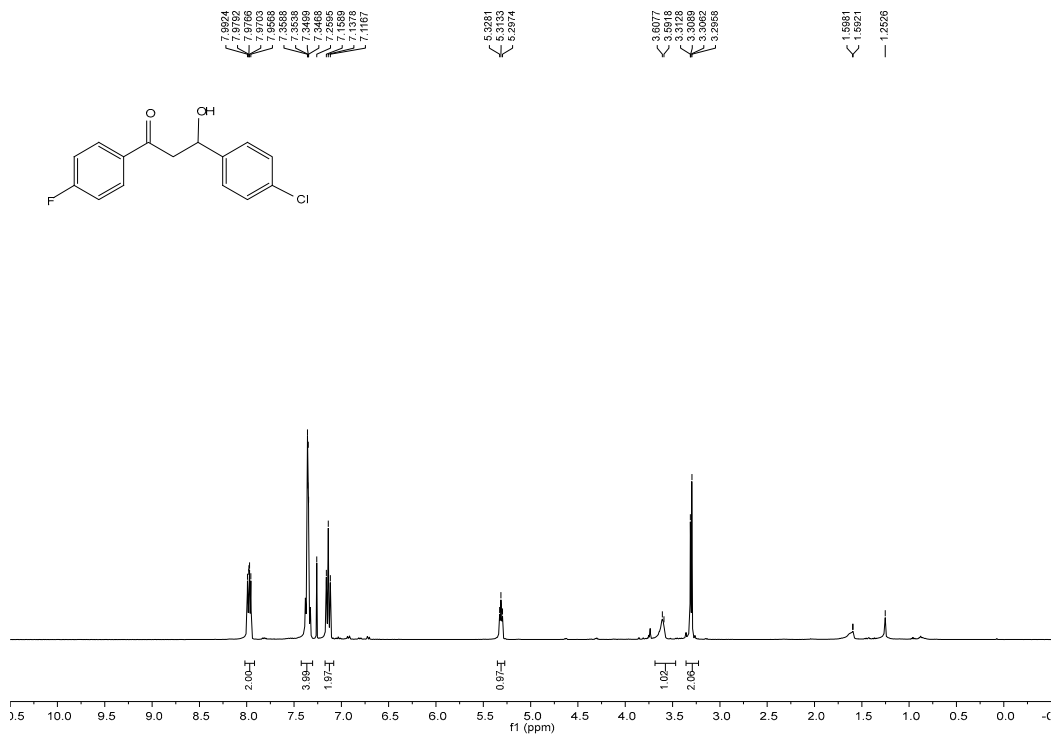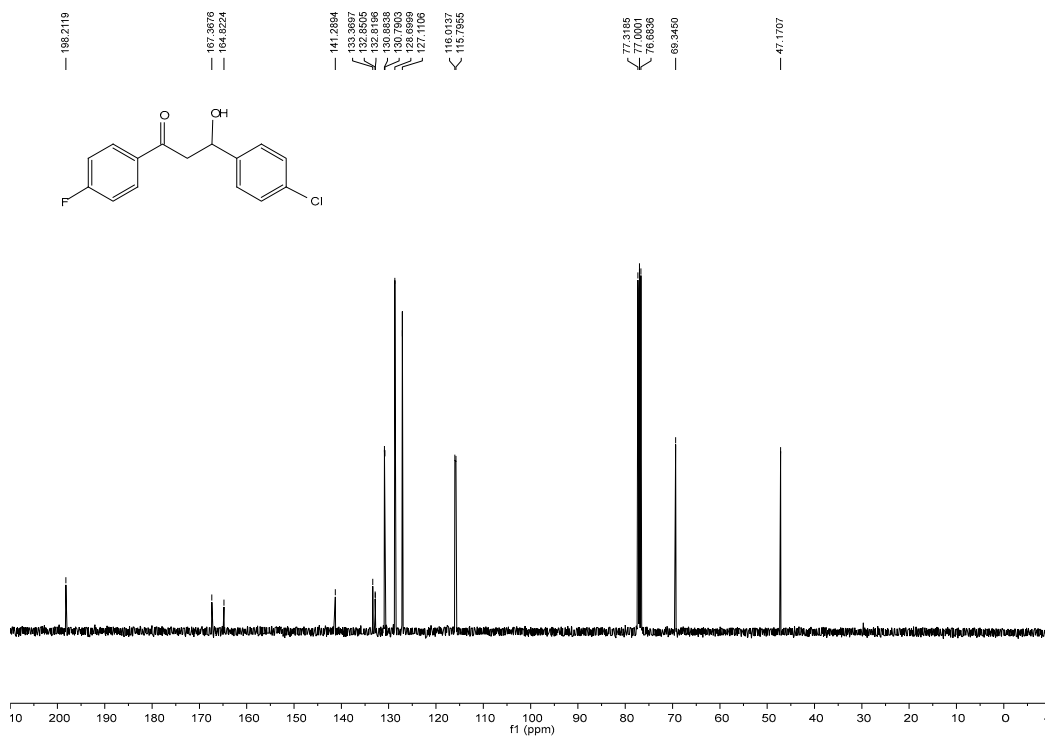

6s

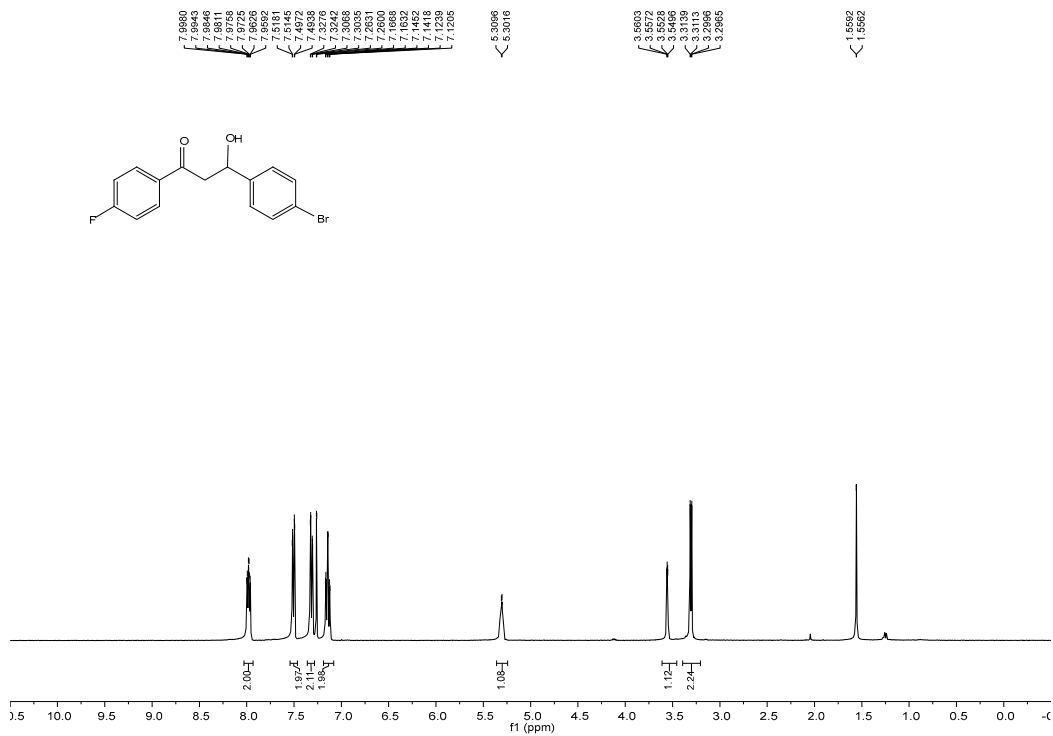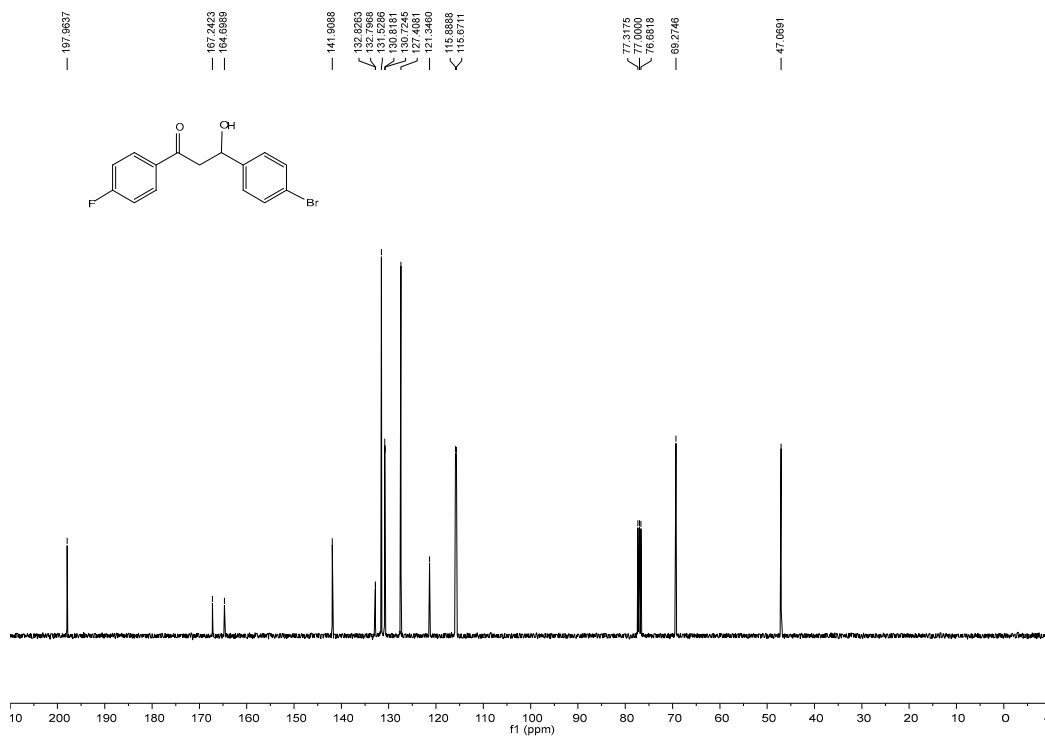

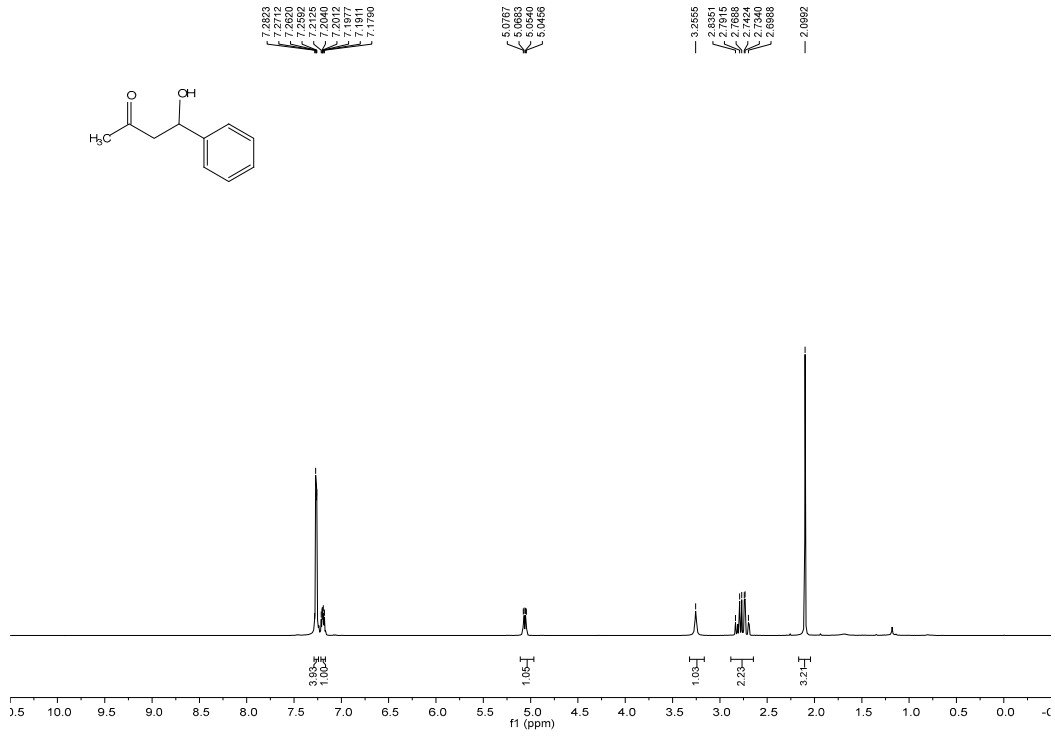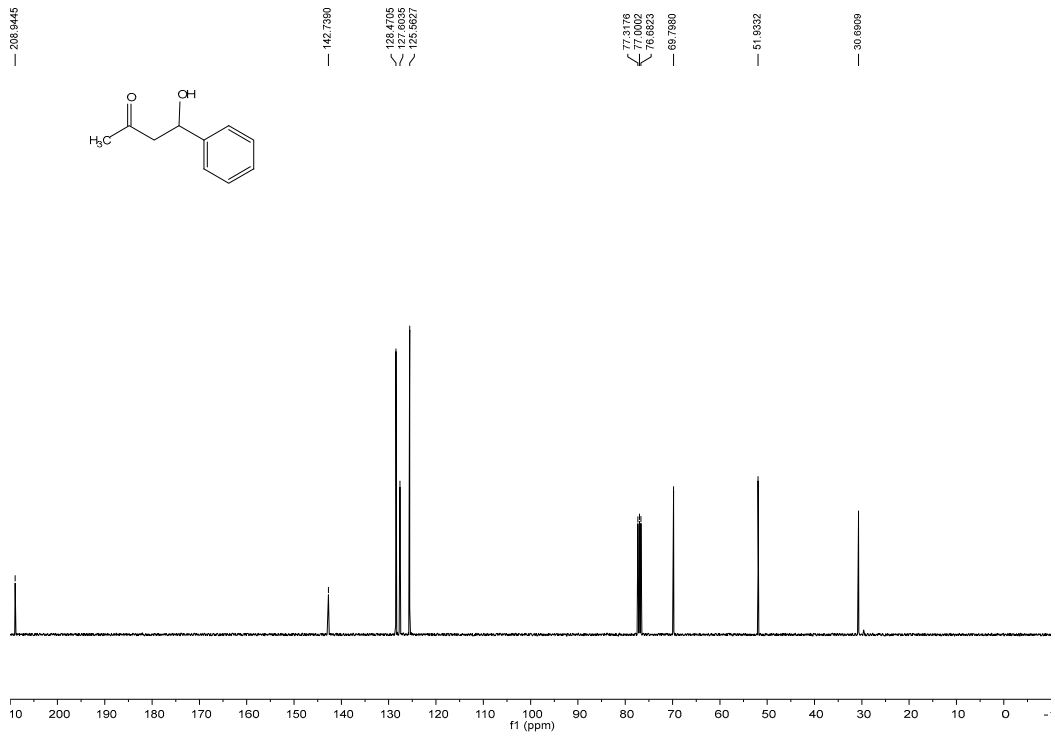

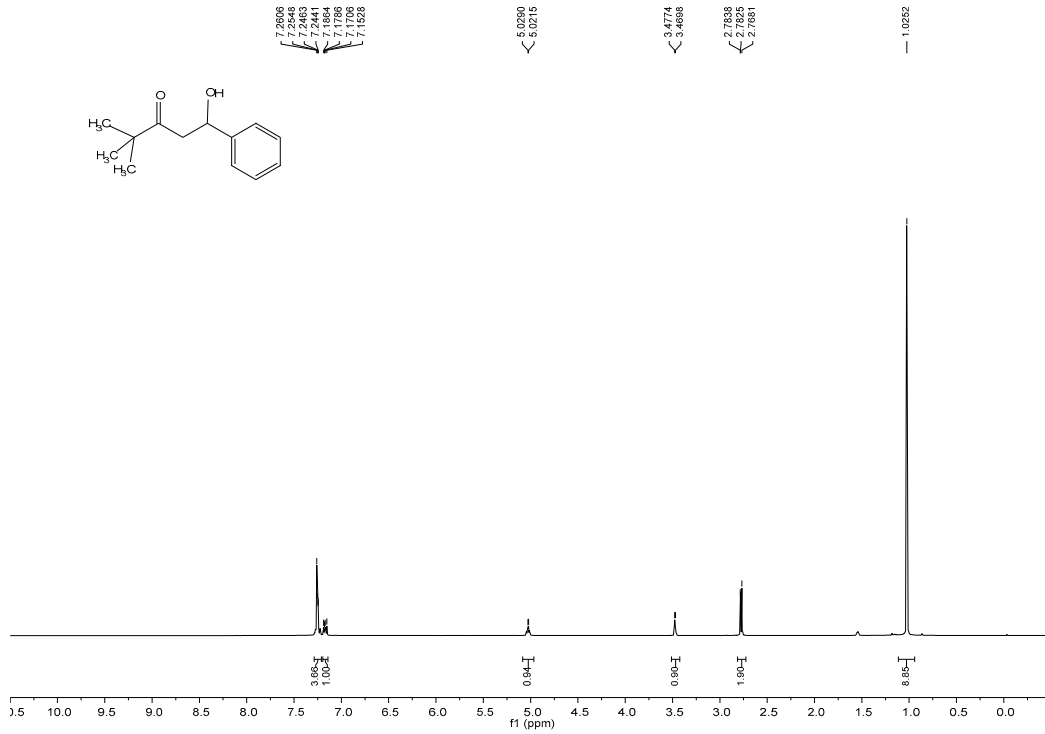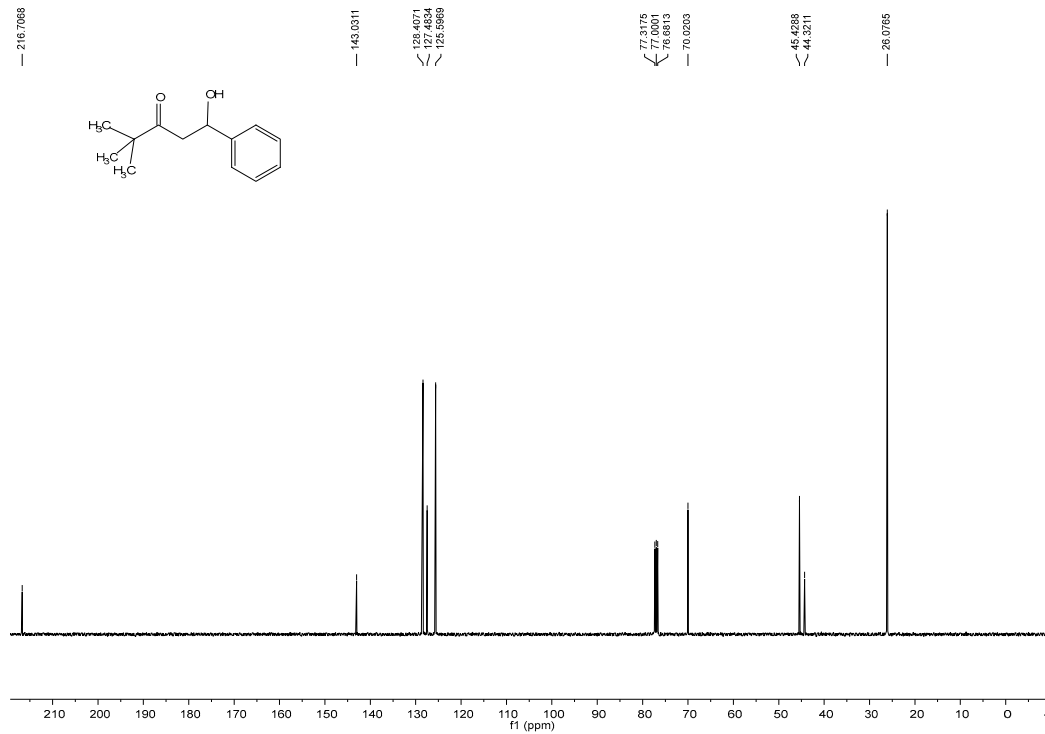

6v.

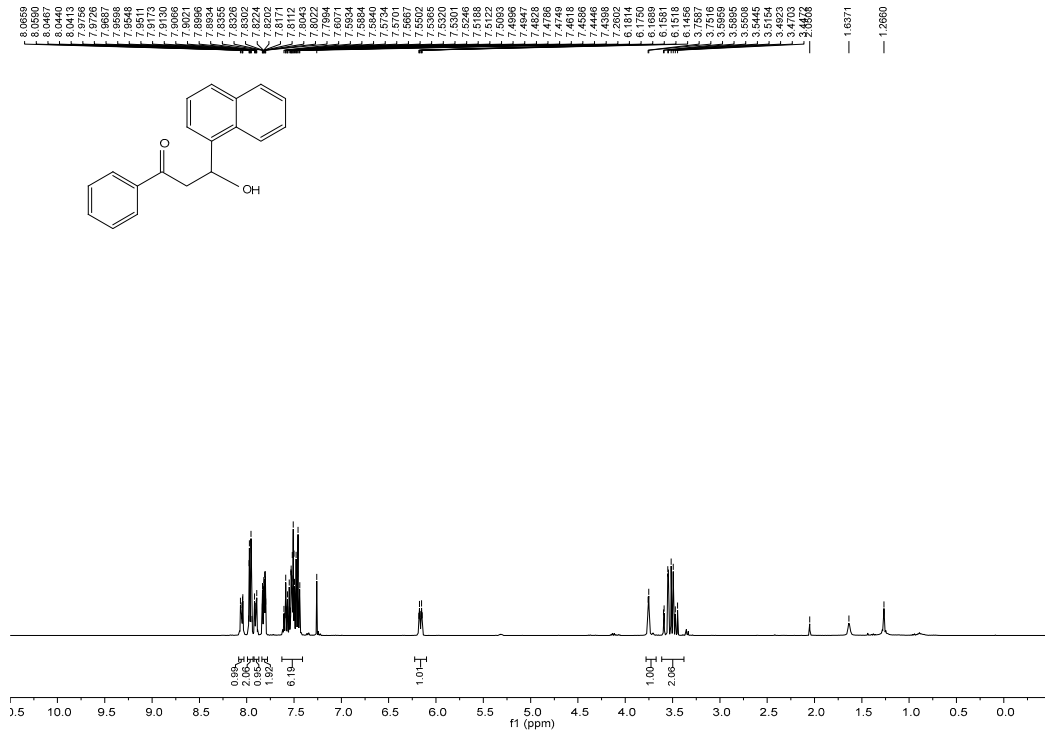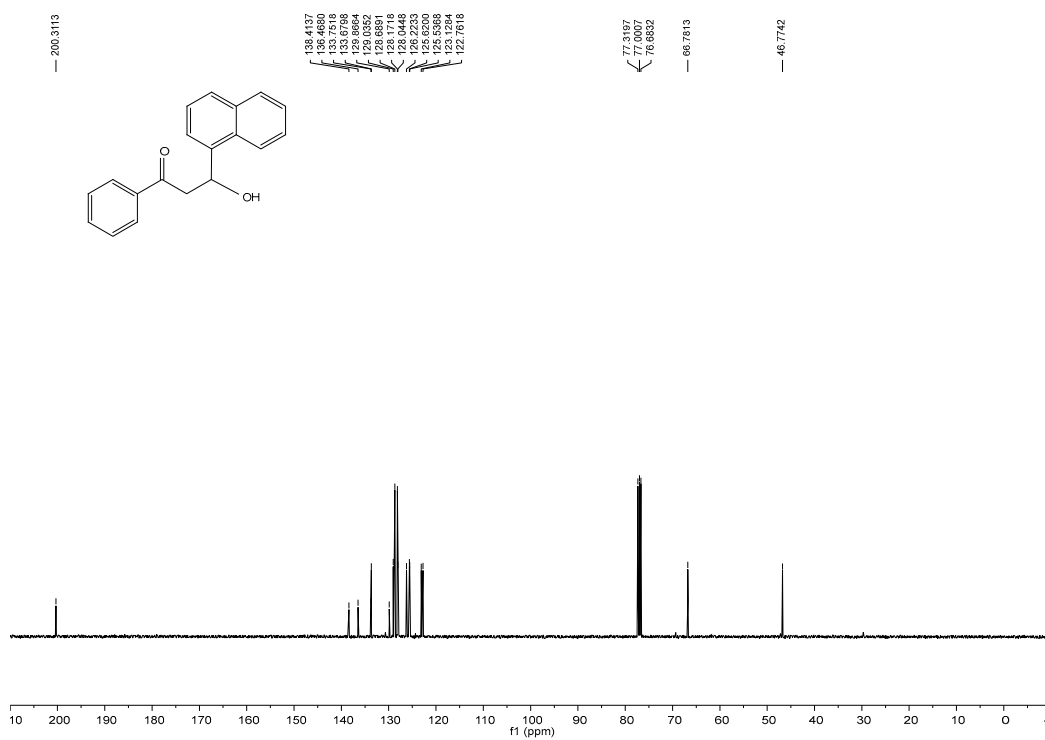



6w

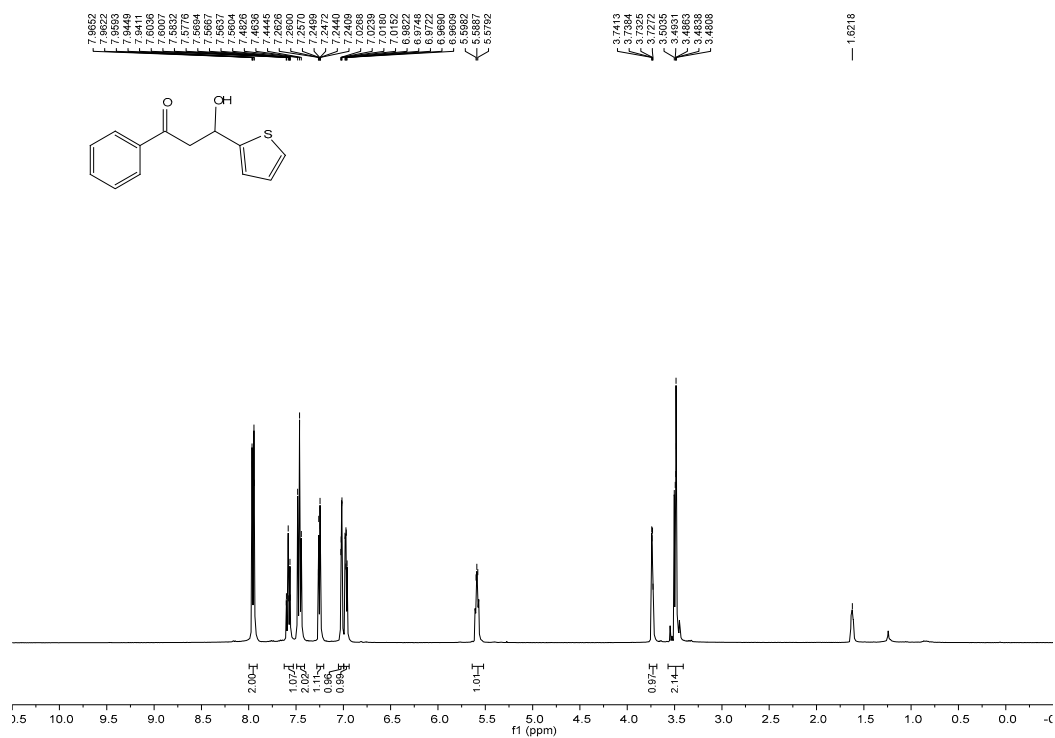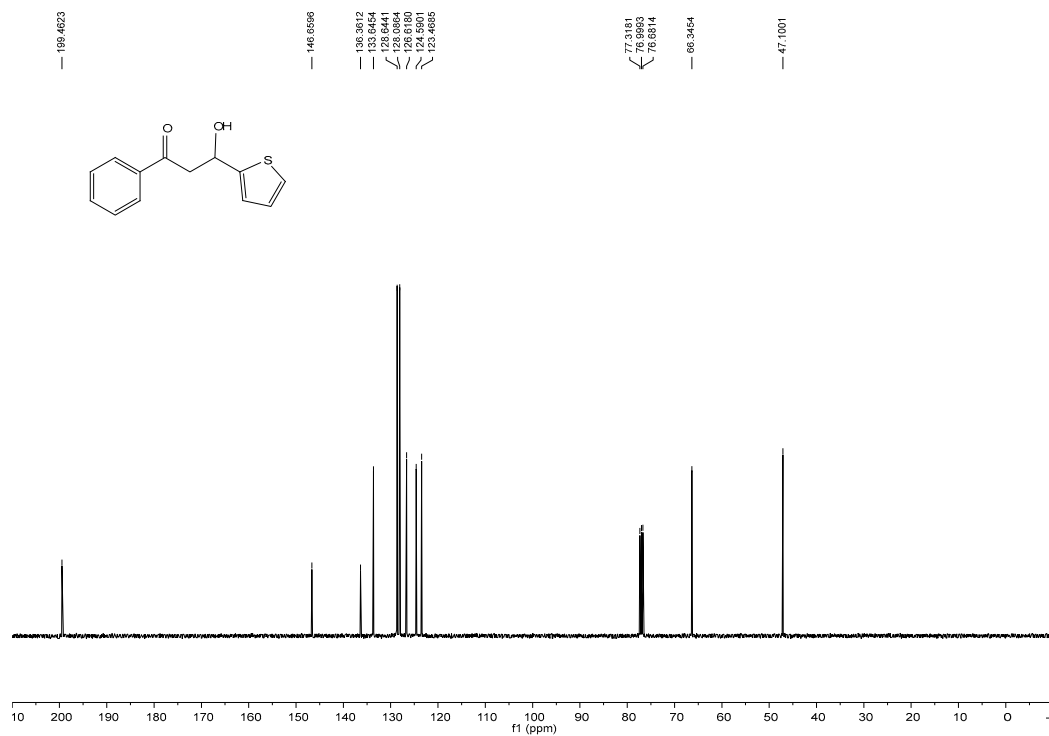

6x

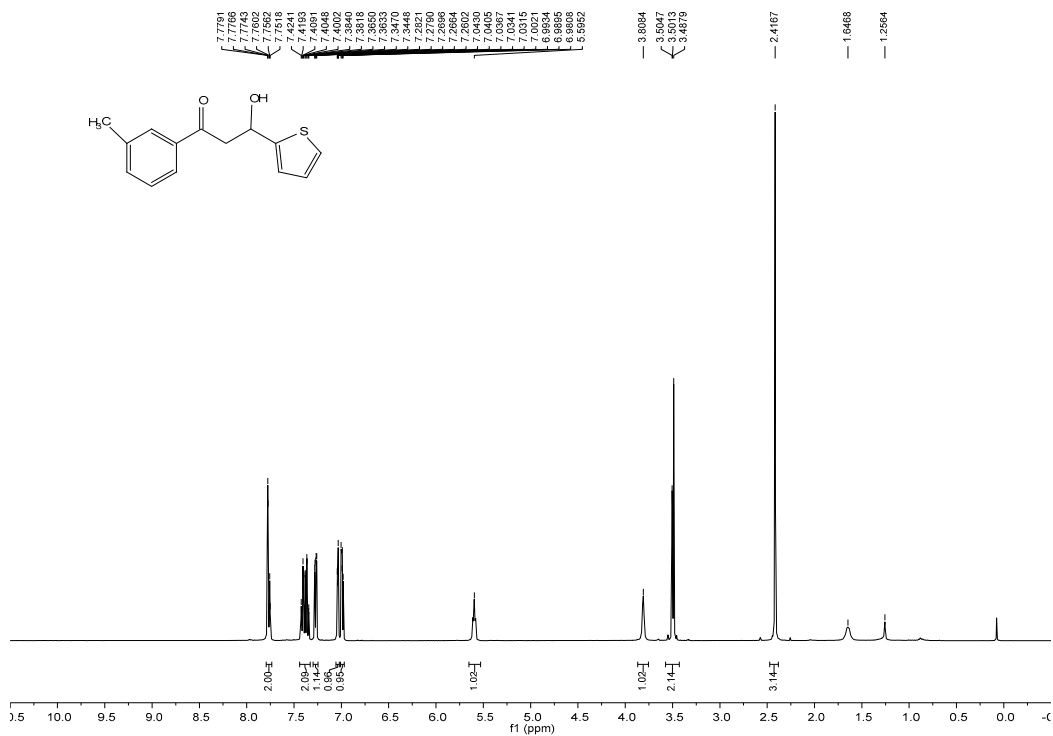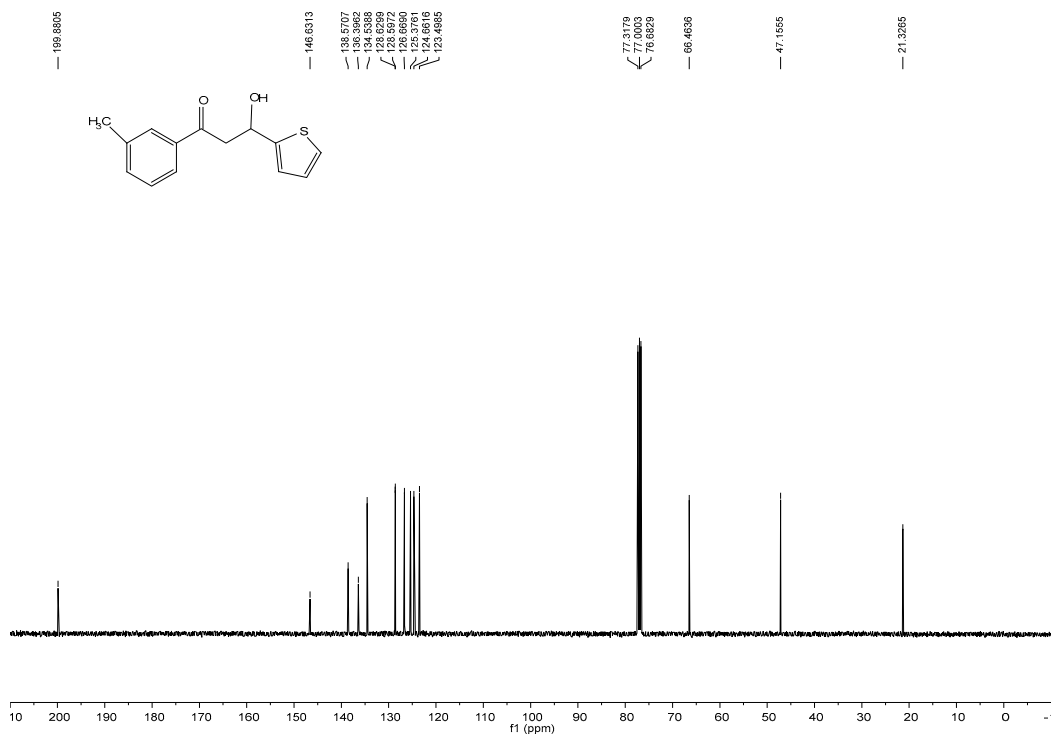

6y

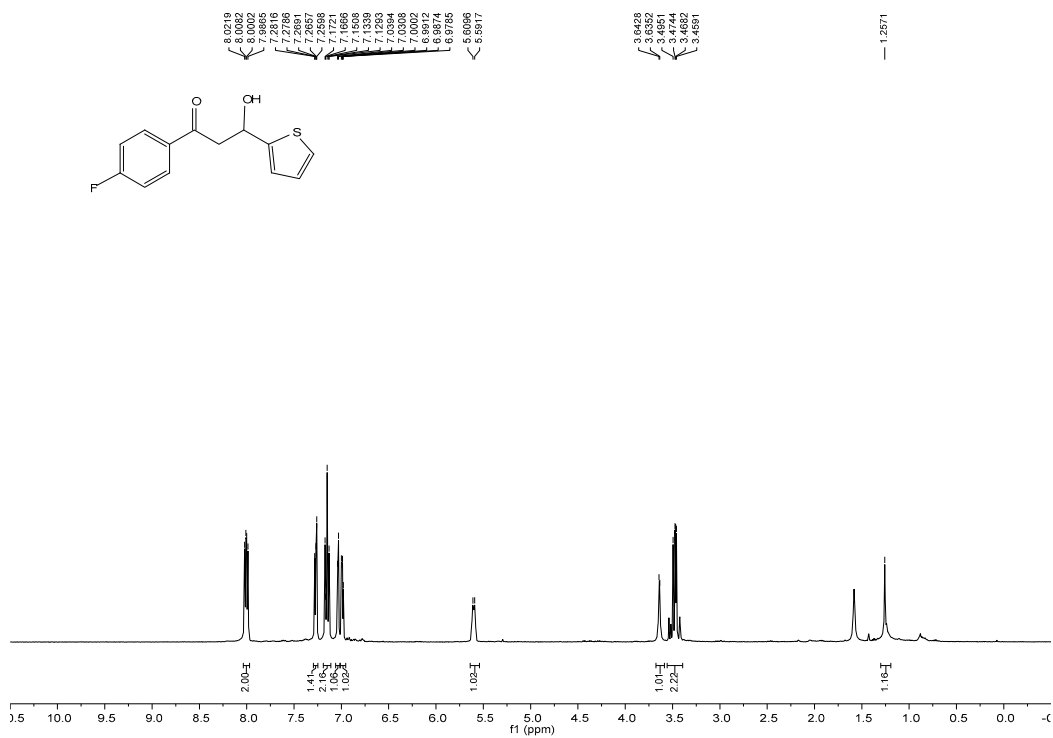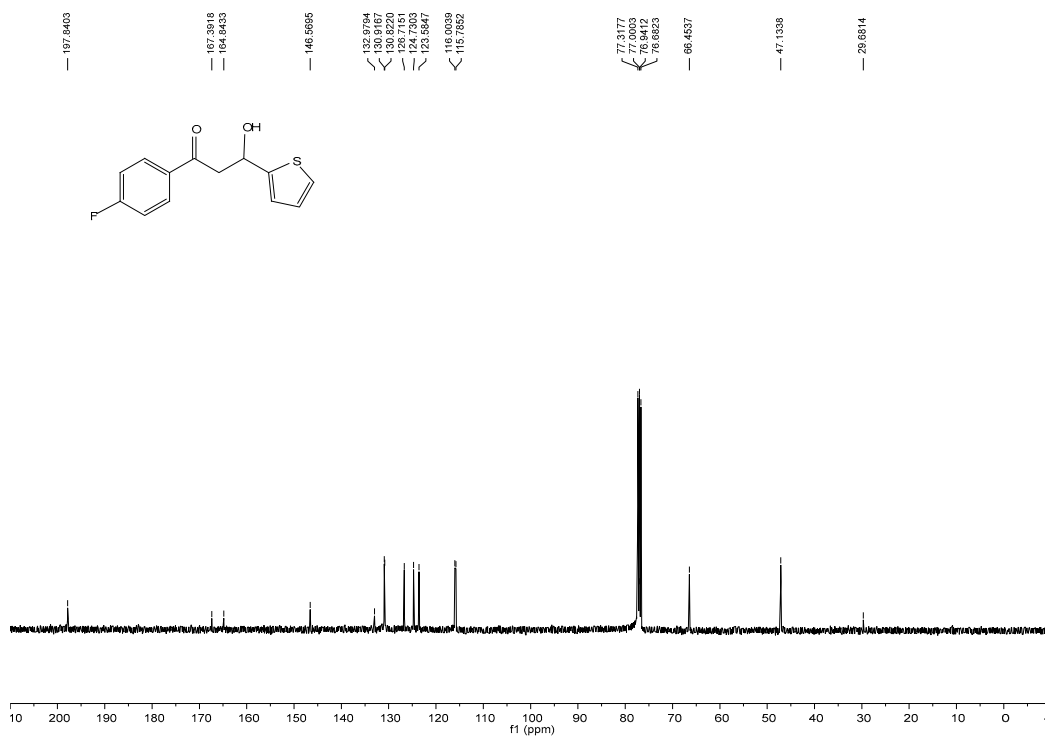

6z

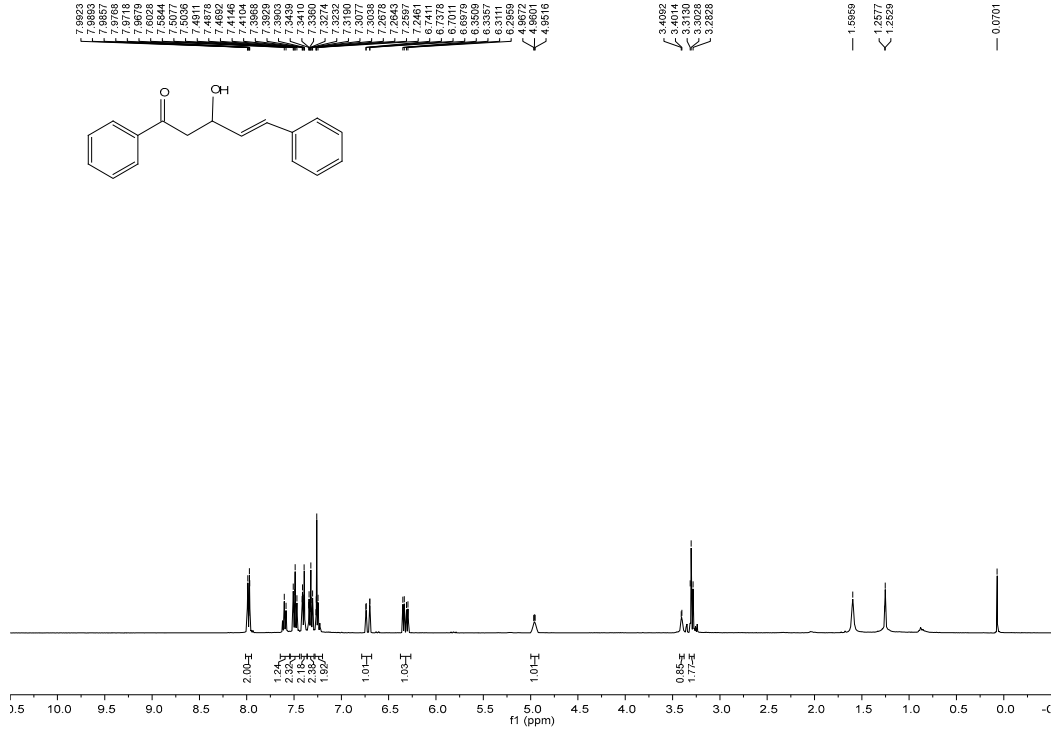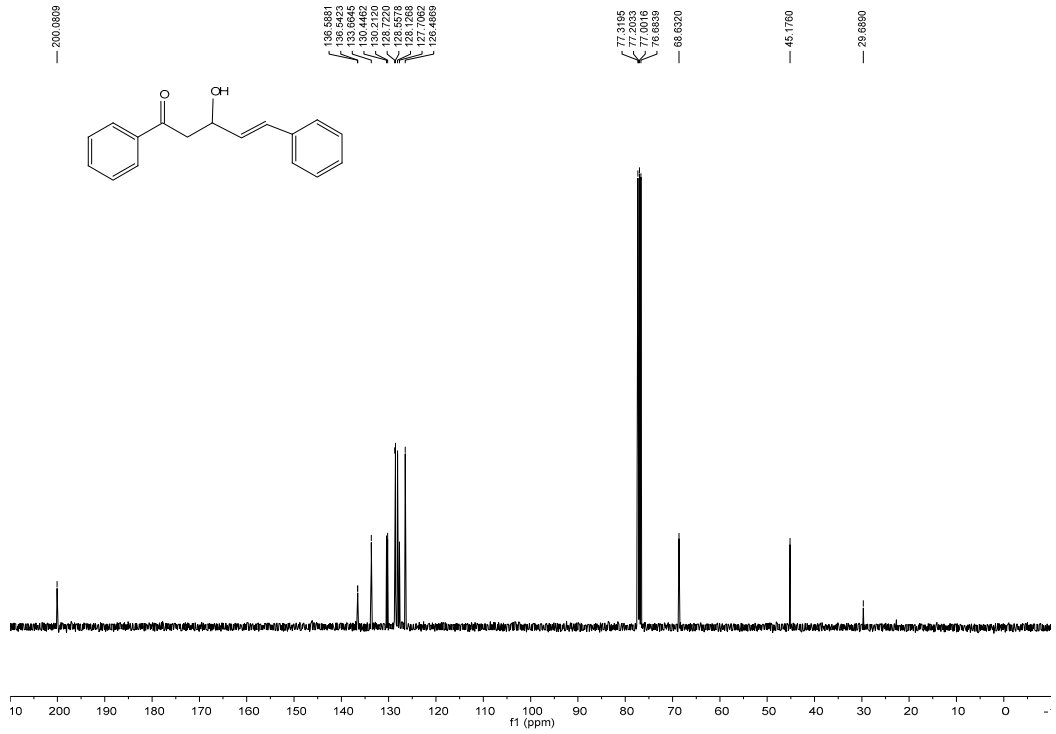

Supplement: polymers-11-01417-s001.pdf [file polymers-11-01417-s001.pdf]
